# Supplementary material
Source: publisher figshare collection journal article supplement (https://acs.figshare.com/ndownloader/files/4035643)
Supplement: Supplementary file 1 [file 4035643]

## **Supporting Information for:**

# Electric Urban Delivery Trucks: Energy Use, Greenhouse Gas Emissions, and Cost-Effectiveness

*Dong-Yeon Lee, \* Valerie M. Thomas, §, † and Marilyn A. Brown †*

\* School of Civil and Environmental Engineering, § School of Industrial and Systems  
Engineering, and † School of Public Policy, Georgia Institute of Technology, Atlanta, GA 30332,  
USA

\* Corresponding author email: [dlee348@gatech.edu](mailto:dlee348@gatech.edu).

The number of pages: 35

The number of figures: 9

The number of tables: 20

## 1. Model Year Difference between Diesel and Electric Trucks in Consideration

Despite the similarities between the diesel and electric trucks in Table 1, the model year of the diesel truck (2006) is older than its electric truck counterpart (2011). Considering medium duty diesel engine and vehicle technology developments since 2006 (1), there may have been at most a 12% improvement in the fuel economy of gross vehicle weight (GVW) class 5 trucks. We include the possible fuel economy improvement between 2006 and 2011 as one of uncertainty factors in the total cost of ownership (TCO) and life-cycle energy use and greenhouse gas (GHG) emissions model.

## 2. Drive Cycles and Fuel Economy Variations

Drive cycle<sup>1</sup> (speed vs. time schedule) affects vehicle energy consumption. Based on the dynamometer test result of the GVW class 5 FedEx diesel delivery truck in Table 1 (2), we consider fuel economy variations according to three different drive cycles: the New York City Cycle (NYCC), the Orange County Transit Authority Bus Cycle (OCTA), and the City-Suburban Heavy Vehicle Cycle (CSHVC) (2). These three drive cycles are shown in Figure 1S. Originally, the dynamometer test was conducted on the NYCC, OCTA, and HTUF Class 4 PDDS (Hybrid Truck Users Forum Class 4 Parcel Delivery Driving Schedule). However, since the HTUF Class 4 PDDS was customized/modified for the dynamometer test and the original drive schedule is not available, we chose the CSHVC as an alternative. The drive cycle is often characterized by kinetic intensity (3), which can be interpreted as below:

$$\frac{\text{acceleration associated with vehicle inertia and road grade}}{\left( \frac{\text{average cubic speed associated with aerodynamic drag}}{\text{average speed}} \right)}$$

Based on the kinetic intensity range, we believe that the NYCC, OCTA, and CSHVC well cover and represent the reported FedEx diesel delivery truck operations (2), also complying with the electric truck capability (e.g., top speed constraint of 50 miles or 31 km per hour).

The dynamometer test was carried out with a payload of 450 kg, but we assume full-load (2,835 kg for diesel truck) operation. Using a vehicle dynamic simulator – Future Automotive Systems Technology Simulator (FASTSim) (4), we adjust the dynamometer test result for the payload difference (2,385 kg), as shown in Table 1S. We use a diesel-powered Sports Utility Vehicle platform to find a relationship between payload and fuel economy. Simulation parameters are listed in Table 1S. We estimate base CSHVC fuel economy, based on kinetic intensity and dynamometer test data for OCTA and modified HTUF Class 4 PDDS. Considering vehicle dynamics, we assume a linear effect of kinetic intensity and payload on fuel economy. In addition to fuel economy variations for the three drive cycles, we also consider the possible fuel economy improvement over time discussed in the previous section.

---

<sup>1</sup> Drive cycle is distinguished from duty cycle which is more associated with vehicle load (e.g., payload and grade), operation range and distance, etc.

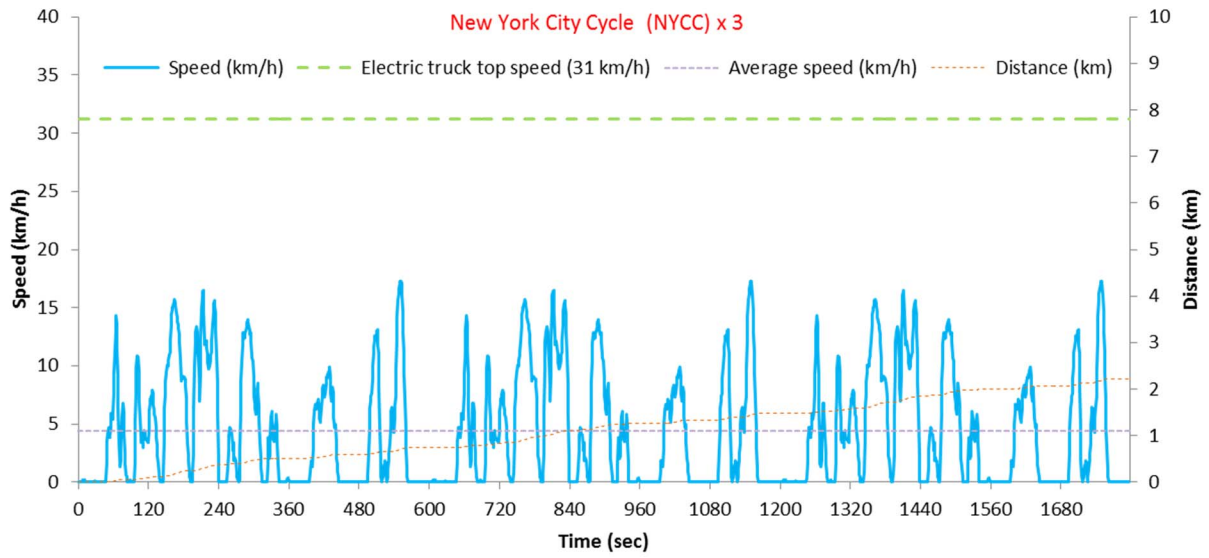

(a) NYCC

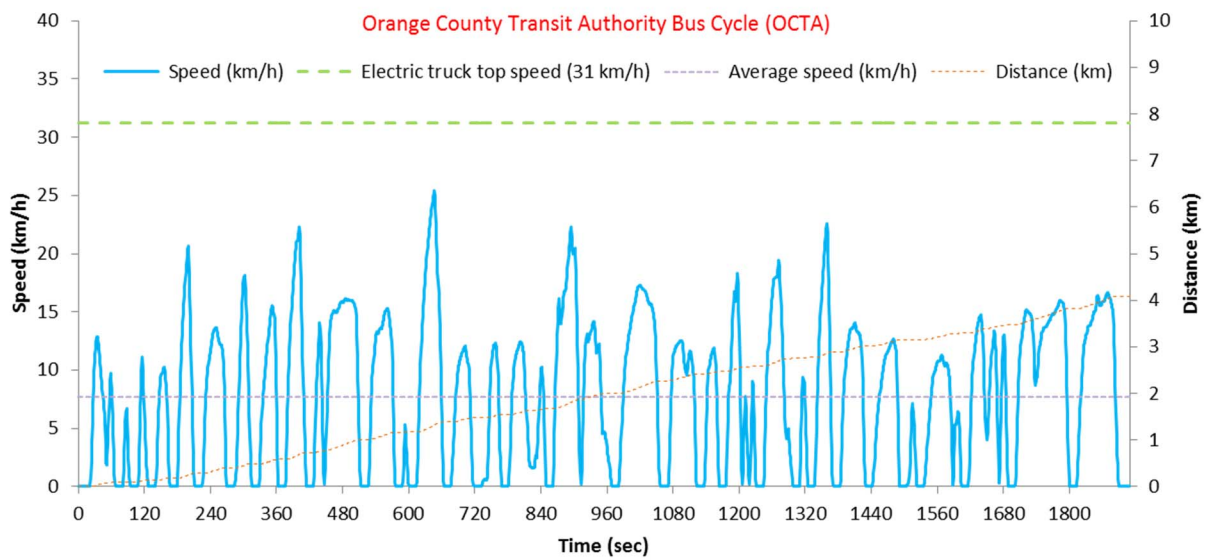

(b) OCTA

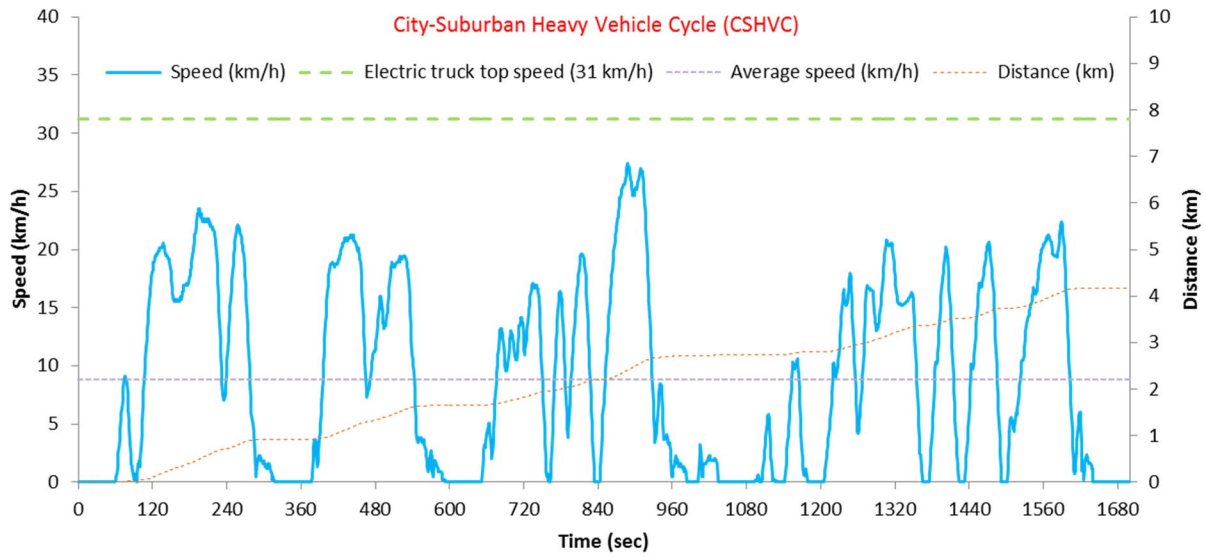

(c) CSHVC

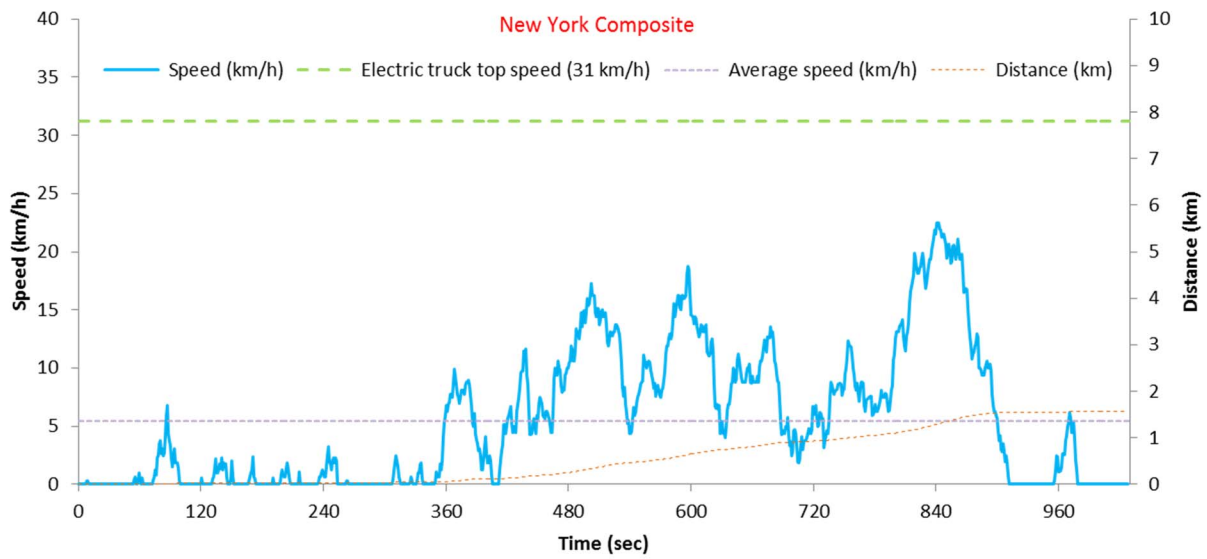

(d) New York Composite

Figure 1S. Drive Cycles – NYCC, OCTA, CSHVC, and New York Composite.

TABLE 1S. Drive Cycles and Fuel Economy at Full Load

| Parameters for diesel-powered vehicle simulation to evaluate payload effect on fuel economy                                                                                                         |                                                              |                                |                   |                                  |
|-----------------------------------------------------------------------------------------------------------------------------------------------------------------------------------------------------|--------------------------------------------------------------|--------------------------------|-------------------|----------------------------------|
| Drag coefficient                                                                                                                                                                                    | 0.5                                                          | Cargo mass (kg)                | 500 – 2,500       |                                  |
| Frontal area (m²)                                                                                                                                                                                   | 4.63                                                         | Engine power (kW)              | 150               |                                  |
| Glider mass (kg)                                                                                                                                                                                    | 4,365                                                        | Tire radius (m)                | 0.4               |                                  |
| Wheel base (m)                                                                                                                                                                                      | 3.9                                                          | Rolling resistance coefficient | 0.01              |                                  |
| 2012 Volkswagen Touareg TDI was used as a base platform with the parameters above adjusted to reflect the difference between SUV and medium-duty truck, based on vehicle test/activity data (2, 5). |                                                              |                                |                   |                                  |
| Payload effect on fuel economy (simulation result)                                                                                                                                                  |                                                              |                                |                   |                                  |
| Payload (kg)                                                                                                                                                                                        | Drive cycles and mpgge (mile per gasoline gallon equivalent) |                                |                   |                                  |
|                                                                                                                                                                                                     | NYCC                                                         | OCTA                           | CSHVC             |                                  |
| 500                                                                                                                                                                                                 | 8.3                                                          | 10.9                           | 12.8              |                                  |
| 2,500                                                                                                                                                                                               | 6.5                                                          | 8.7                            | 10.2              |                                  |
| Δ Payload (kg)                                                                                                                                                                                      | 2,000                                                        |                                |                   |                                  |
| Δ mpgge                                                                                                                                                                                             | 1.8                                                          | 2.2                            | 2.6               |                                  |
| % Δ mpgge reduction per kg                                                                                                                                                                          | 0.0108                                                       | 0.0101                         | 0.0102            |                                  |
|                                                                                                                                                                                                     | 0.0104 (average)                                             |                                |                   |                                  |
| Dynamometer and field test fuel economy result (2)                                                                                                                                                  |                                                              |                                |                   |                                  |
| Payload (kg)                                                                                                                                                                                        | Drive cycles and fuel economy (mpg)                          |                                |                   |                                  |
|                                                                                                                                                                                                     | NYCC                                                         | OCTA                           | Modified HTUF4    | CSHVC                            |
| 450                                                                                                                                                                                                 | 6.08                                                         | 9.52                           | 11.66             | 11.37<br>(estimated based on KI) |
| Kinetic Intensity (KI) (1/km)                                                                                                                                                                       | 5.2                                                          | 2.2                            | 0.8               | 1.1                              |
| Full payload (kg)                                                                                                                                                                                   | 2,835                                                        |                                |                   |                                  |
| Δ Payload (kg)                                                                                                                                                                                      | 2,385                                                        |                                |                   |                                  |
| Estimate of fuel economy at full load (mpg), based on dynamometer data and payload effect above                                                                                                     |                                                              |                                |                   |                                  |
| Payload (kg)                                                                                                                                                                                        | Fuel economy (km/l)                                          |                                |                   |                                  |
|                                                                                                                                                                                                     | Baseline                                                     | NYCC                           | OCTA              | CSHVC                            |
| 2,835                                                                                                                                                                                               | 3.38<br>(8 mpg)                                              | 1.93<br>(4.6 mpg)              | 3.03<br>(7.2 mpg) | 3.62<br>(8.6 mpg)                |
| 12% improvement case                                                                                                                                                                                |                                                              |                                |                   |                                  |
| Payload (kg)                                                                                                                                                                                        | Fuel economy (km/l)                                          |                                |                   |                                  |
|                                                                                                                                                                                                     | Baseline                                                     | NYCC                           | OCTA              | CSHVC                            |
| 2,835                                                                                                                                                                                               | 3.79<br>(9 mpg)                                              | 2.17<br>(5.1 mpg)              | 3.39<br>(8 mpg)   | 4.05<br>(9.6 mpg)                |

### 3. Electric Truck Energy Efficiency

Like the diesel truck, electric truck efficiency can vary depending upon drive cycles as shown below. We estimate the electric truck efficiency using FASTSim (4) and the three drive cycles aforementioned. Simulation parameters are summarized in Table 2S. To reflect real-world vehicle operation data, we adjust the simulation result using the difference (75%) between simulation (33 mpgge) and field-test (25 mpgge) results on the New York Composite drive cycle (Figure 1S). We also consider  $\pm 20\%$  efficiency uncertainty based on vehicle activity data (5). These estimates are higher (less efficient) than the simplistic estimate value (70% efficiency, oftentimes used as a fixed figure). For the baseline (drive cycle) case, we take the average of OCTA and CSHVC to follow the same pattern as the diesel truck.

TABLE 2S. Electric Truck Energy Efficiency

| Simplistic estimate                                                                                                                                                                                                               |                  |                                |                   |      |       |
|-----------------------------------------------------------------------------------------------------------------------------------------------------------------------------------------------------------------------------------|------------------|--------------------------------|-------------------|------|-------|
| Parameters                                                                                                                                                                                                                        |                  | Aggregate efficiency (MJ/km)   |                   |      |       |
| Battery capacity (kWh)                                                                                                                                                                                                            | 80 <sup>6</sup>  | 2.3                            |                   |      |       |
| Electric drive range (km)                                                                                                                                                                                                         | 160 <sup>6</sup> |                                |                   |      |       |
| Advertised electric drivetrain efficiency (MJ/km)                                                                                                                                                                                 | 1.8              |                                |                   |      |       |
| DC-DC converter efficiency (%)                                                                                                                                                                                                    | 97 <sup>7</sup>  |                                |                   |      |       |
| Inverter efficiency (%)                                                                                                                                                                                                           | 97 <sup>7</sup>  |                                |                   |      |       |
| Tractive induction motor efficiency (%)                                                                                                                                                                                           | 94 <sup>8</sup>  |                                |                   |      |       |
| Charging/discharging efficiency (%)                                                                                                                                                                                               | 90 <sup>9</sup>  |                                |                   |      |       |
| Parameters for electric vehicle simulation                                                                                                                                                                                        |                  |                                |                   |      |       |
| Drag coefficient                                                                                                                                                                                                                  | 0.5              | Cargo mass (kg)                | 3,230 (full load) |      |       |
| Frontal area (m²)                                                                                                                                                                                                                 | 4.89             | Electric motor power (kW)      | 120               |      |       |
| Glider mass (kg)                                                                                                                                                                                                                  | 4,260            | Tire radius (m)                | 0.4               |      |       |
| Wheel base (m)                                                                                                                                                                                                                    | 3.9              | Rolling resistance coefficient | 0.01              |      |       |
| 2012 Nissan Leaf was used as a base platform with the parameters above adjusted to reflect the difference between passenger car and medium-duty truck, based on vehicle specifications (6) and vehicle test/activity data (2, 5). |                  |                                |                   |      |       |
| Electric truck efficiency estimate                                                                                                                                                                                                |                  |                                |                   |      |       |
|                                                                                                                                                                                                                                   |                  | Drive Cycles                   |                   |      |       |
|                                                                                                                                                                                                                                   |                  | Baseline                       | NYCC              | OCTA | CSHVC |
| Max<br>(+20%)                                                                                                                                                                                                                     | mpgge            | 32.5                           | 25.0              | 30.7 | 34.3  |
|                                                                                                                                                                                                                                   | MJ/km            | 2.3                            | 3.0               | 2.5  | 2.2   |
| Baseline<br>(adjusted simulation result)                                                                                                                                                                                          | mpgge            | 27.1                           | 20.9              | 25.6 | 28.6  |
|                                                                                                                                                                                                                                   | MJ/km            | 2.8                            | 3.6               | 3.0  | 2.7   |
| Min<br>(-20%)                                                                                                                                                                                                                     | mpgge            | 21.7                           | 16.7              | 20.5 | 22.9  |
|                                                                                                                                                                                                                                   | MJ/km            | 3.5                            | 4.5               | 3.7  | 3.3   |

#### 4. Natural Gas Life-Cycle GHG Emissions

For natural gas (NG) life-cycle GHG emissions in Table 2, we considered three categories of natural gas: domestic NG including pipeline imports from Mexico and Canada; overseas NG imported in the liquefied form (LNG); and synthetic and other types of NG, without carbon capture and sequestration.

TABLE 3S. Natural Gas: Life-Cycle GHG Emissions

| Type of NG Consumed in U.S. Electricity Generation Sector <sup>10</sup> |       | Life-Cycle GHG Emissions (gCO <sub>2</sub> e/MJ) <sup>11</sup> |
|-------------------------------------------------------------------------|-------|----------------------------------------------------------------|
| Domestic NG                                                             | 98.3% | 156                                                            |
| Overseas LNG                                                            | 1.4%  | 200                                                            |
| Synthetic NG (SNG) and other                                            | 0.2%  | 444                                                            |
| Weighted Total                                                          | 100%  | 158                                                            |

## 5. Vehicle production: Energy Use and GHG Emissions

For the diesel truck production energy use and GHG emissions, we utilized Carnegie Mellon University Green Design Institute's EIO-LCA database (12). We estimated GVW class 5 diesel truck production data (9 MJ/\$ and 0.607 kgCO<sub>2</sub>e/\$) by interpolation based on the curb weight differentials between an average passenger car and an average heavy-duty tractor-trailer. As the EIO-LCA data are based on 2002 vehicle prices, we estimated 2002 diesel truck purchase price to be approximately the same as the current price of \$60,000 (13, 14) using the consumer price index for new trucks (15).

TABLE 4S. Vehicle Manufacture Energy Use and GHG Emissions, Excluding Battery

| Vehicle Type                                                                       | ICE Passenger Car            |                       |                           | Electric Passenger Car   | GVW Class 5 FedEx Diesel Truck <sup>a</sup> |
|------------------------------------------------------------------------------------|------------------------------|-----------------------|---------------------------|--------------------------|---------------------------------------------|
|                                                                                    | Toyota Corolla <sup>16</sup> | VW Golf <sup>17</sup> | Ford Taurus <sup>18</sup> | VW Golf EV <sup>17</sup> |                                             |
| Curb Weight (10 <sup>3</sup> kg)                                                   | 1.28                         | 1.06                  | 1.7                       | 0.89                     | 4.4                                         |
| Vehicle Production Energy Use (10 <sup>3</sup> MJ)                                 | 102                          | 94.3                  | N/A                       | 88.4                     | 540                                         |
| Vehicle Production GHG Emissions (10 <sup>3</sup> kgCO <sub>2</sub> e)             | 8.5                          | 5.2                   | 10                        | 5.09                     | 36                                          |
| Vehicle Production (w/o Battery) Energy Use and GHG Emissions per Unit Curb Weight |                              |                       |                           |                          |                                             |
| Energy Use (MJ/kg)                                                                 | 79.7                         | 89                    | N/A                       | 99.8                     | 120                                         |
| Avg. Energy Use (MJ/kg)                                                            | 84.5 ± 6.4                   |                       |                           |                          |                                             |
| GHG Emissions (kgCO <sub>2</sub> e/kg)                                             | 6.6                          | 4.9                   | 5.9                       | 5.75                     | 8                                           |
| Avg. Emissions (kgCO <sub>2</sub> e/kg)                                            | 5.82 ± 0.9                   |                       |                           |                          |                                             |
| Ratio of ICE and Electric (w/o Battery) Passenger Car Manufacturing                |                              |                       |                           |                          |                                             |
| Energy Use                                                                         | 1.18                         |                       |                           |                          |                                             |
| GHG Emissions                                                                      | 1.01                         |                       |                           |                          |                                             |

<sup>a</sup> Estimated from passenger car and heavy-duty tractor-trailer EIO-LCA data (12). Detailed calculations are in Table 5S.



TABLE 5S. Energy Use and GHG Emissions for GVW Class 5 Diesel Truck Production

| EIO-LCA:<br>Vehicle Production                                    | Passenger<br>Car    | Tractor                 | Trailer                 | Tractor-<br>Trailer |
|-------------------------------------------------------------------|---------------------|-------------------------|-------------------------|---------------------|
| Energy Use (MJ/\$)                                                | 7.25 <sup>12</sup>  | 9.76 <sup>12</sup>      | 10.9 <sup>12</sup>      | 10.3                |
| GHG Emissions (kgCO <sub>2</sub> e/\$)                            | 0.49 <sup>12</sup>  | 0.64 <sup>12</sup>      | 0.75 <sup>12</sup>      | 0.70                |
| Curb Weight (kg)                                                  | 1,665 <sup>19</sup> | 7,650 <sup>19, 20</sup> | 5,290 <sup>19, 20</sup> | 6,470               |
| Difference between Passenger Car and Heavy-Duty Tractor & Trailer |                     |                         |                         |                     |
| (Δ Energy Use (MJ/\$))/(Δ Curb Weight)                            |                     | 0.000641                |                         |                     |
| (Δ GHG Emissions (kgCO <sub>2</sub> e/\$))/(Δ Curb Weight)        |                     | 0.000043                |                         |                     |
| Difference between Passenger Car and GVW Class 5 Diesel Truck     |                     |                         |                         |                     |
| Δ Curb Weight (kg)                                                |                     | 2,740                   |                         |                     |
| Δ Energy Use (MJ/\$)                                              |                     | 1.75                    |                         |                     |
| Δ GHG Emissions (kgCO <sub>2</sub> e/\$)                          |                     | 0.117                   |                         |                     |
| GVW Class 5 Diesel Truck Manufacture                              |                     |                         |                         |                     |
| Energy Use (MJ/\$)                                                |                     | 9.0                     |                         |                     |
| GHG Emissions (kgCO <sub>2</sub> e/\$)                            |                     | 0.607                   |                         |                     |
| Year 2002 Diesel Truck Price (2002 \$)                            |                     | 60,000                  |                         |                     |
| Energy Use (10 <sup>3</sup> MJ)                                   |                     | 540                     |                         |                     |
| GHG Emissions (10 <sup>3</sup> kgCO <sub>2</sub> e)               |                     | 36.4                    |                         |                     |

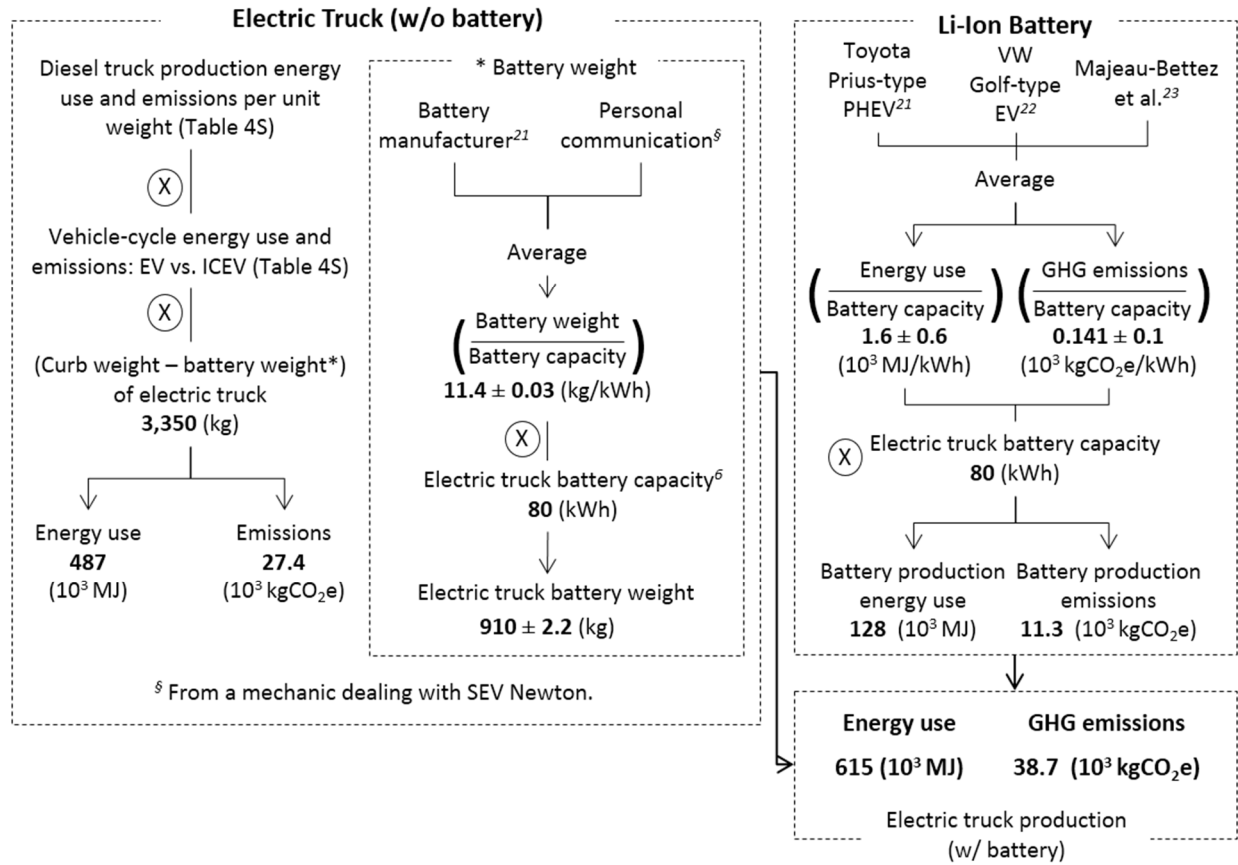

Figure 2S. Energy use and GHG emissions of electric truck (w/ Li-Ion battery) production.

## 6. End-of-Life Vehicle (ELV): Energy Use and GHG Emissions

According to the U.S. Environmental Protection Agency (EPA), 95% of automotive lead-acid batteries and 35% of the rubber from automobile and truck tires are recycled in the U.S. (24). In total, more than 75% of automotive materials are estimated to be reused, remanufactured, or recycled (25). Metals account for more than 75% of total vehicle weight (25), and about 95% of this weight is recycled (26). For ELV analysis, we only include metals recycling as illustrated in Figure 3S. About 20% of end-of-life engines (2.5 million out of 12.5 million end-of-life vehicles or engines per year) are remanufactured (26, 27), and other parts could also be remanufactured or reused, but we assume that they will be ultimately recycled.

In terms of the automotive metals' embodied energy (direct energy content plus indirect energy required for mining, concentration, smelting, refining, transport, etc.) (25, 28), net energy savings are about 30%, as shown in Table 6S. Here the net value includes the energy loss associated with the ELV collection, separation, recovery, etc. However, only 95% of metals are recovered through recycling processes. And the energy savings effect only applies to the substitution of raw material extraction and primary material processes which accounts for 86% of total vehicle-cycle energy use, as illustrated in Figure 3S and Table 6S. Thus, final energy savings from recycling is 25% of total vehicle-cycle energy use

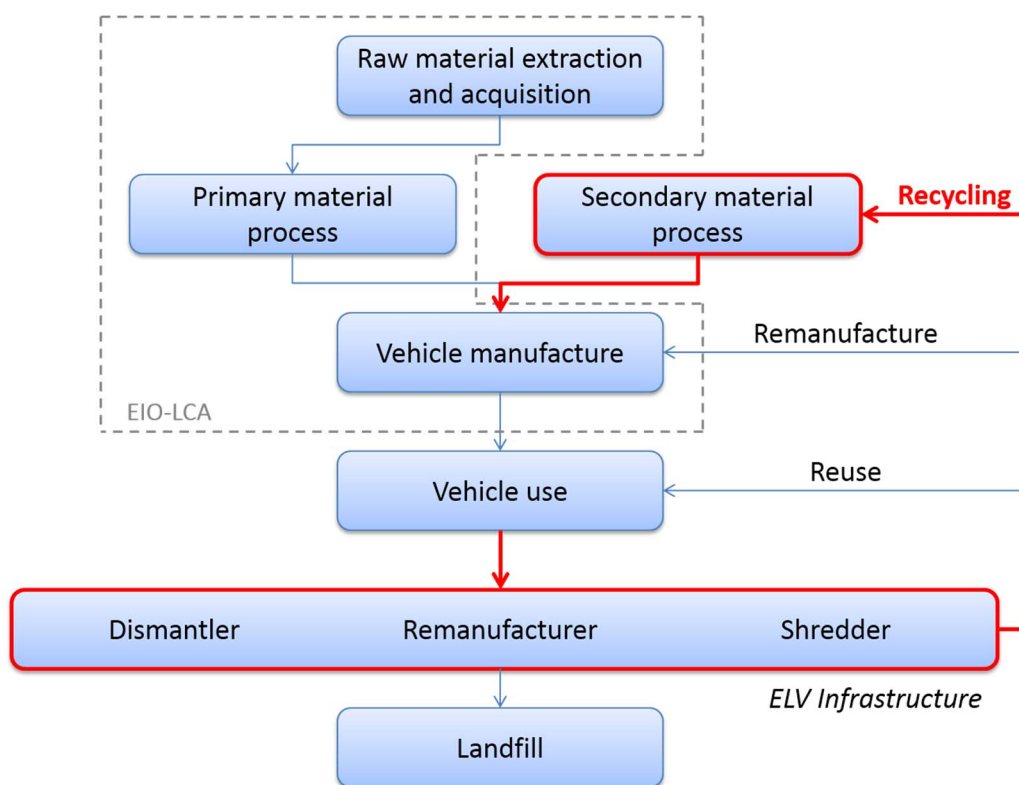

Figure 3S. Boundary of End-of-Life Vehicle Analysis

(excluding Li-Ion battery and EVSE). Likewise, GHG emissions reduction is estimated to be about 17%.

The estimated savings (25% energy use and 17% GHG emissions) above apply to non-battery vehicle production. The automotive Li-Ion battery is not currently recycled in the U.S. It is possible that auto makers or battery manufacturers will collect end-of-life Li-Ion batteries and send them to ELV infrastructure or electronics battery recycling facilities, and it has been reported that 19% life-cycle energy savings can be achieved from Li-Ion battery recycling (29). As experience with electric vehicle end-of-life management develops, further data will become available; in our study, the net energy use and GHG emissions savings from end-of-life Li-Ion batteries are assumed to be 0. We also assume that the EVSE recycling effect is negligible.

TABLE 6S. Net Energy and GHG Emissions Savings from ELV Recycling

| Materials (Metals)                                          | % of embodied energy saved by recycling | Source |
|-------------------------------------------------------------|-----------------------------------------|--------|
| Aluminum                                                    | 82%                                     | 25     |
| Iron, Carbon Steel, Other Ferrous                           | 39%                                     |        |
| Stainless Steel                                             | 20%                                     |        |
| Copper                                                      | 69%                                     |        |
| Zinc                                                        | 38%                                     |        |
| Lead                                                        | 97%                                     |        |
| <b>MY 2009 Light-Duty Vehicles (LDV) Materials (Metals)</b> | <b>% of weight</b>                      | 30     |

|                                                                                                           |                                         |          |
|-----------------------------------------------------------------------------------------------------------|-----------------------------------------|----------|
| Aluminum                                                                                                  | 8.3%                                    |          |
| Copper                                                                                                    | 1.6%                                    |          |
| Zinc                                                                                                      | 0.2%                                    |          |
| Lead                                                                                                      | 1.1%                                    |          |
| Other Ferrous                                                                                             | 0.8%                                    |          |
| Iron                                                                                                      | 5.3%                                    |          |
| Regular Steel                                                                                             | 38%                                     |          |
| High-Strength Steel                                                                                       | 13%                                     |          |
| Stainless Steel                                                                                           | 1.8%                                    |          |
| <b>Weighted Total Net Energy Savings</b>                                                                  | <b>27%</b>                              |          |
| <b>Heavy-Duty Vehicle (HDV) Materials (Metals)</b>                                                        | <b>% of weight</b>                      | 31       |
| Steel                                                                                                     | 51.3%                                   |          |
| Iron                                                                                                      | 13.0%                                   |          |
| Aluminum                                                                                                  | 14.3%                                   |          |
| Copper                                                                                                    | 1.0%                                    |          |
| Lead                                                                                                      | 0.5%                                    |          |
| <b>Weighted Total Net Energy Savings</b>                                                                  | <b>33%</b>                              |          |
| LDV and HDV Average Net Energy Savings                                                                    | 30%                                     | -        |
| ELV Metals Recovered                                                                                      | 95%                                     | 26       |
| Material Production and Extraction Proportion in Non-Recycling Vehicle-Cycle Energy Use                   | 86%                                     | 32       |
| <b>Final Net Energy Savings of Total Vehicle-Cycle Energy Use (w/o Li-Ion Battery and EVSE)</b>           | <b>(30% x 95% x 86%)<br/>25%</b>        | -        |
| GHG Emissions Reduction per Vehicle Recycled                                                              | 2.4 10 <sup>3</sup> kgCO <sub>2</sub> e | 33       |
| GHG Emissions of Average Passenger Car Production from Raw Material                                       | 7.9 10 <sup>3</sup> kgCO <sub>2</sub> e | Table 3S |
| Net GHG Emissions Savings                                                                                 | 30%                                     |          |
| Material Production and Extraction Proportion in Non-Recycling Vehicle-Cycle GHG Emissions                | 57%                                     | 31       |
| <b>Final Net GHG Emissions Savings of Total Vehicle-Cycle GHG Emissions (w/o Li-Ion Battery and EVSE)</b> | <b>(30% x 57%)<br/>17%</b>              | -        |

## 7. Electric Truck Purchase Price

Battery capacity, vehicle size, curb weight, and/or payload can all affect electric truck purchase price. Specifications are often missing in price reports, increasing the price uncertainty. It should be noted that the SEV Newton has at least 16 different models varying by vehicle size, curb weight, payload, and battery capacity (Table 9S). Thus, it is important to identify the purchase price according to vehicle specifications. For the electric truck whose specifications are listed in Table 7S, we estimate the purchase price would range from \$85,000 to \$97,000, as illustrated in Tables 8S-10S.

TABLE 7S. Target Electric Truck Specification

|                        |                     |       |
|------------------------|---------------------|-------|
| Vehicle size           | Overall length (m)  | 6.8   |
|                        | Wheel base (m)      | 3.9   |
|                        | Height w/o body (m) | 2.4   |
|                        | Width w/o body (m)  | 2.15  |
| GVW (kg)               |                     | 7,490 |
| Curb weight (kg)       |                     | 4,260 |
| Payload (kg)           |                     | 3,230 |
| Battery capacity (kWh) |                     | 80    |

TABLE 8S. Reported Electric Truck Purchase Prices

| Diesel Truck Price | Specifications                          | Electric Truck (SEV Newton) Price                                                                                             | Specifications                                                                                                                                   | Source |
|--------------------|-----------------------------------------|-------------------------------------------------------------------------------------------------------------------------------|--------------------------------------------------------------------------------------------------------------------------------------------------|--------|
| \$60,000           | -                                       | \$85,000 - \$90,000                                                                                                           | -                                                                                                                                                | 13     |
| \$62,700           | Overall length: 6.1 m<br>GVW: 11,475 kg | \$123,600                                                                                                                     | Overall length: 6.1 m<br>GVW: 11,475 kg<br><i>Estimated</i> payload: 7,560 kg (Table 9S)<br><i>Estimated</i> battery capacity: 80 kWh (Table 9S) | 14     |
| -                  | -                                       | Chassis and cab: \$75,000<br>Battery: \$25,000 (40 kWh)<br>- \$75,000 (120 kWh)<br><i>Estimated</i> battery price: 625 \$/kWh | -                                                                                                                                                | 34     |
| \$60,000           | -                                       | \$90,000                                                                                                                      | -                                                                                                                                                | 35     |
| -                  | -                                       | \$150,000                                                                                                                     | Payload: 7,000 kg<br>Range: 160 km<br>Overall length: 9 m<br>Box length: 6.5 m<br><i>Estimated</i> battery capacity: 120 kWh (Table 9S)          | 36     |

TABLE 9S. SEV Newton Electric Truck Specifications (5)

| Wheel Base (mm) | Gross Vehicle Weight (kg) | Battery Pack Capacity (kWh) | Curb Weight (kg) | Payload (kg) | Deck Length (mm) | Overall Length (mm) | Overall Height (mm) | Overall Width (mm) |
|-----------------|---------------------------|-----------------------------|------------------|--------------|------------------|---------------------|---------------------|--------------------|
| 3,900           | 7,490                     | 80                          | 4,260            | 3,230        | 4,449            | 6,795               | 2,390               | 2,150              |
| 3,900           | 9,990                     | 80                          | 4,400            | 5,590        | 4,449            | 6,795               | 2,390               | 2,150              |
| 3,900           | 11,990                    | 80                          | 4,432            | 7,558        | 4,449            | 6,795               | 2,390               | 2,150              |
| 3,900           | 7,490                     | 120                         | 4,728            | 2,762        | 4,449            | 6,795               | 2,390               | 2,150              |
| 3,900           | 9,990                     | 120                         | 4,818            | 5,172        | 4,449            | 6,795               | 2,390               | 2,150              |
| 3,900           | 11,990                    | 120                         | 4,900            | 7,090        | 4,449            | 6,795               | 2,390               | 2,150              |
| 4,500           | 7,490                     | 80                          | 4,269            | 3,221        | 5,434            | 7,795               | 2,390               | 2,150              |
| 4,500           | 9,990                     | 80                          | 4,390            | 5,600        | 5,434            | 7,795               | 2,390               | 2,150              |
| 4,500           | 11,990                    | 80                          | 4,482            | 7,508        | 5,434            | 7,795               | 2,390               | 2,150              |
| 4,500           | 7,490                     | 120                         | 4,737            | 2,753        | 5,434            | 7,795               | 2,390               | 2,150              |
| 4,500           | 9,990                     | 120                         | 4,858            | 5,132        | 5,434            | 7,795               | 2,390               | 2,150              |
| 4,500           | 11,990                    | 120                         | 4,950            | 7,040        | 5,434            | 7,795               | 2,390               | 2,150              |
| 5,100           | 9,990                     | 80                          | 4,456            | 5,534        | 6,449            | 8,795               | 2,390               | 2,150              |
| 5,100           | 11,990                    | 80                          | 4,591            | 7,399        | 6,449            | 8,795               | 2,390               | 2,150              |
| 5,100           | 9,990                     | 120                         | 4,924            | 5,066        | 6,449            | 8,795               | 2,390               | 2,150              |
| 5,100           | 11,990                    | 120                         | 5,059            | 6,931        | 6,449            | 8,795               | 2,390               | 2,150              |

TABLE 10S. Price Estimate of Target SEV Newton w/ Specifications in Table 7S

|                                                                              |  |                                       |
|------------------------------------------------------------------------------|--|---------------------------------------|
| Non-battery (chassis & cab) vehicle price <i>per unit payload</i> (Table 8S) |  | \$9.9                                 |
| Non-battery (chassis & cab) vehicle price <i>per unit GVW</i> (Table 8S)     |  | \$6.3                                 |
| <b>Payload (kg)</b>                                                          |  | <b>GVW (kg)</b>                       |
| 3,230                                                                        |  | 7,490                                 |
| <b>Payload-based non-battery part</b>                                        |  | <b>GVW-based non-battery part</b>     |
| \$32,000                                                                     |  | \$47,000                              |
| <b>80 kWh battery cost</b>                                                   |  |                                       |
| \$50,000                                                                     |  |                                       |
| <b>GVW-based SEV Newton Price</b>                                            |  | <b>Payload-based SEV Newton Price</b> |
| \$82,000<br>(lower than reported)                                            |  | \$97,000                              |
| <b>Min</b>                                                                   |  | <b>Max</b>                            |
| \$85,000<br>(lowest among the reported - Table 8S)                           |  | \$97,000                              |

## 8. Electric Truck Li-Ion Battery Lifetime

Battery replacement can be very significant in terms of the total cost of ownership (TCO), given the expensive automotive Li-Ion battery price. Battery replacement is mainly determined by battery cycle life along with potential mechanical or chemical failure. Battery cycle life usually refers to the point when battery capacity reaches 80% of the original capacity after a certain number of recharging activities (cycles). As shown in Table 11S, the maximum expected cycles (4,800 – 9,600 depending upon VKT demand and recharging frequency) fall within the estimate of cycle life (more than 10,000).

TABLE 11S. Electric Truck Battery Cycle Life Estimation

| Battery capacity                           |                              |                                             |                                     | 80                                                                         | kWh                                              |
|--------------------------------------------|------------------------------|---------------------------------------------|-------------------------------------|----------------------------------------------------------------------------|--------------------------------------------------|
| Battery lifetime<br>(37, 38)               |                              | Cycle life at 100% depth of discharge (DoD) |                                     | 2,800                                                                      | cycles                                           |
|                                            |                              | Range per full charge                       |                                     | 160                                                                        | km                                               |
|                                            |                              | For 2,800 cycles                            |                                     | 448,000                                                                    | km                                               |
| Vehicle lifetime VKT in our study          |                              |                                             |                                     | 240,000                                                                    | km                                               |
| Electric truck energy efficiency (Table 2) |                              |                                             |                                     | 0.78                                                                       | kWh/km                                           |
| Daily VKT (km)                             | Recharging frequency per day | VKT between charges                         | DoD (%) with 0.78 kWh/km efficiency | Estimated cycle life based on 200 cycle life gain per 1% DoD decrease (39) | Cycles (total recharging frequency) for 20 years |
| 48                                         | 1                            | 48                                          | 47                                  | 10,000                                                                     | 4,800                                            |
|                                            | 2                            | 24                                          | 23                                  | > 10,000                                                                   | 9,600                                            |
| 96                                         | 1                            | 96                                          | > 100                               | -                                                                          | 4,800                                            |
|                                            | 2                            | 48                                          | 47                                  | 10,000                                                                     | 9,600                                            |

## 9. Electric Truck Li-Ion Battery Price

Our estimate of current battery price is 625 \$/kWh (40). There has been a wide range of automotive Li-Ion battery price estimates (Figure 4S). Battery prices are changing rapidly (40, 41), and thus some of the projections in Figure 4S may be outdated.

The projections in Figure 4S are for passenger car HEVs, PHEVs, or EVs, which have a higher power-to-energy ratio than the electric truck. The SEV Newton has a very low power-to-energy ratio (1 – 1.5 W/Wh) and also a very high battery capacity (80 – 120 kWh) compared to passenger car PHEV (e.g., GM Volt – 6.94 W/Wh, 16 kWh) or EV (e.g., Nissan Leaf – 3.33 W/Wh, 24 kWh) (5, 42, 43). As shown in Figure 5S, battery prices (\$/kWh) increase with the power-to-energy ratio (W/Wh).

Figure 5S indicates that batteries with power-to-energy ratios in the range of 1 to 6 have prices in the range of 200-300 \$/kWh. The average is about 230 \$/kWh, which we use as an estimate of the 2020 electric truck battery price. It should be noted that the MIT report assumes high production volume (100,000 electric vehicle batteries per year) for the price projection; according to the Energy Information Administration projection (44), annual electric vehicle sales will reach 100,000 in 2016 – 2018.

We do not incorporate the resale value of Li-ion truck battery packs, because resale markets do not yet exist for them. After their useful life in vehicles, batteries could be resold to utilities for use as back-up power for solar and wind power to store energy and regulate frequency. This would reduce the life cycle cost of electric delivery trucks.

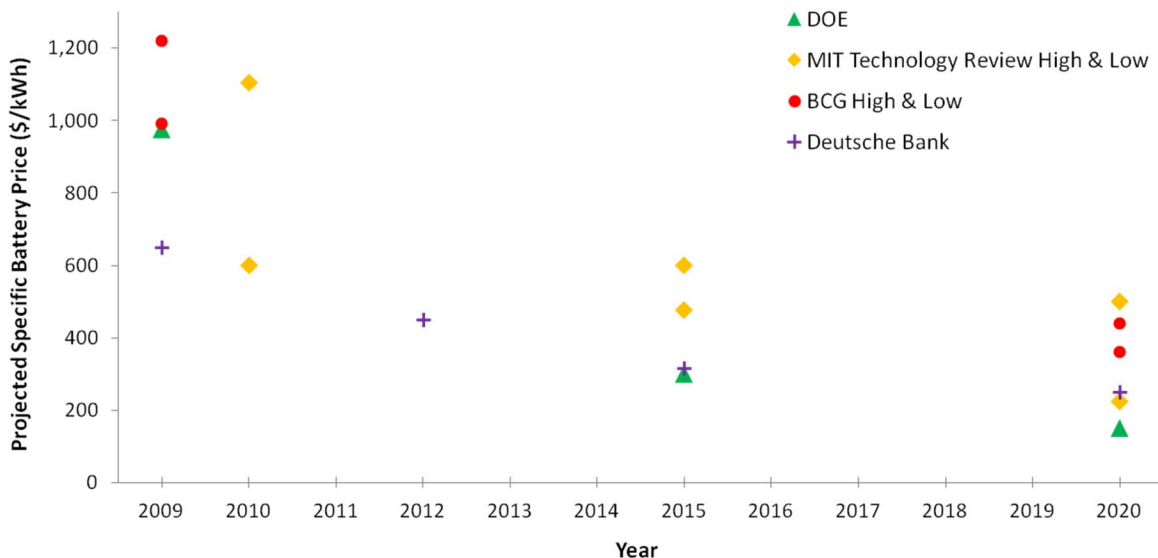

Figure 4S. Battery price projections. DOE: Ref 45; MIT Technology Review High & Low: Ref 46; The Boston Consulting Group (BCG) High & Low: Ref 47; Deutsche Bank: Ref 40.

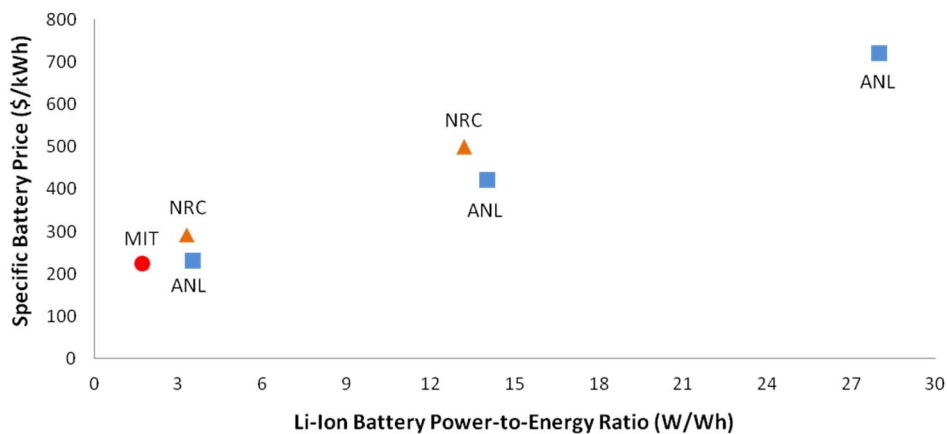

Figure 5S. Specific battery cost variation according to power-to-energy ratio. Argonne National Laboratory (ANL): Ref 48; MIT: Ref 49; National Research Council (NRC): Ref 50.



## 10. Electric Vehicle Supply Equipment (EVSE) Price

We assume that electric truck fleet operators will use either EVSE Level 1 or Level 2. Since EVSE Level 1 comes with the electric truck, there is no cost associated with EVSE Level 1. EVSE Level 2 current and future price estimates are listed in Table 12S.

TABLE 12S. Current and Future EVSE Level 2 Price

| Electric Vehicle Supply Equipment (EVSE) Level 2 Price |       | Installation |        | Source |
|--------------------------------------------------------|-------|--------------|--------|--------|
| Min                                                    | Max   | Min          | Max    |        |
| 1,000                                                  | 7,000 | 860          | 7,400  | 51     |
| 2,614                                                  | 6,353 | 500          | 7,000  | 52     |
| 1,600                                                  |       | 2,000        | 10,000 | 53     |
| -                                                      |       | 316          | 4,065  | 54     |
| 4,213                                                  |       |              |        | 55     |
| Total: EVSE Level 2 + Installation                     |       |              |        |        |
| Min                                                    | 1,860 | Max          | 14,400 |        |
| 2017 (after 6 years) Price (50% of 2011 price)         |       |              |        |        |
| Min                                                    | 930   | Max          | 7,200  |        |

## 11. Diesel Fuel and Electricity Price

Figure 6S shows the four diesel fuel price scenarios and two electricity price scenarios that we used for the TCO calculation.

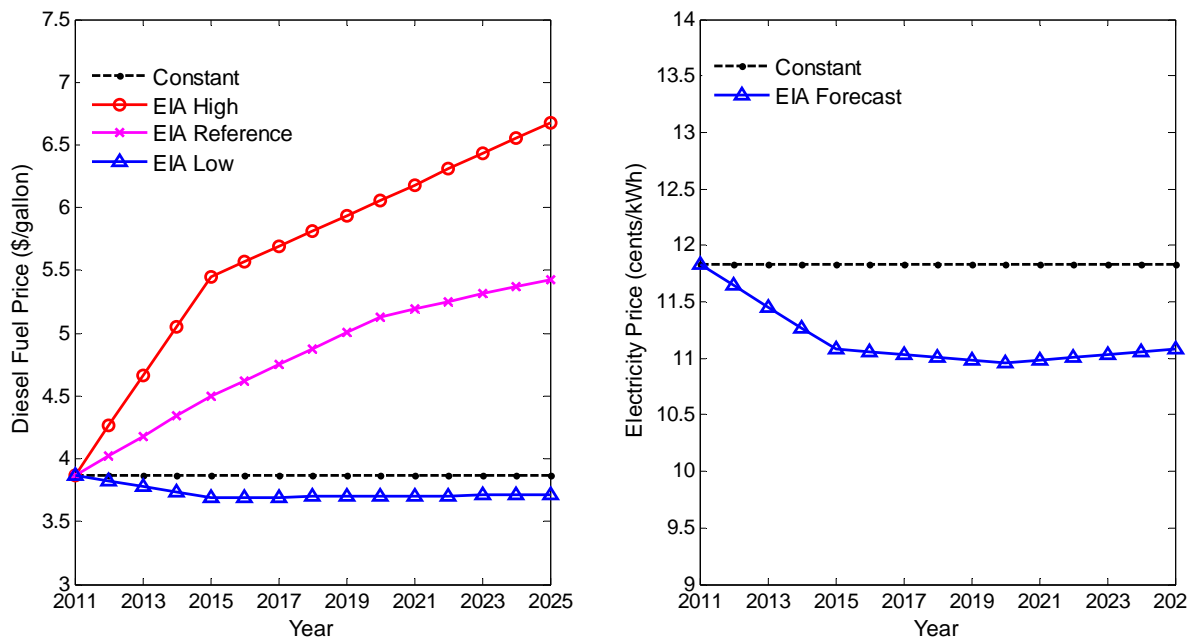

Figure 6S. Diesel fuel and electricity price projections, adapted from (9, 56, 57), with 2011 prices as initial values.

## 12. Power Generation Mix

Table 13S. State-by-State and U.S. Average Electricity Generation Mix without Imports from Other States or Abroad: 2011-2012 and 2025 (adapted from 58).

| State | Coal  | Natural Gas | Nuclear | Hydroelectric Conventional | Petroleum | Other |          |
|-------|-------|-------------|---------|----------------------------|-----------|-------|----------|
|       |       |             |         |                            |           | Wind  | Non-Wind |
| AK    | 9.0%  | 53.4%       | 0.0%    | 23.8%                      | 13.4%     | 0.2%  | 0.1%     |
| AL    | 32.9% | 33.5%       | 25.6%   | 5.9%                       | 0.1%      | 0.0%  | 2.0%     |
| AR    | 45.9% | 22.9%       | 23.5%   | 4.9%                       | 0.1%      | 0.0%  | 2.8%     |
| AZ    | 38.7% | 23.0%       | 29.4%   | 8.1%                       | 0.0%      | 0.3%  | 0.5%     |
| CA    | 1.0%  | 48.6%       | 15.2%   | 18.5%                      | 0.3%      | 4.7%  | 11.8%    |
| CO    | 65.3% | 20.3%       | 0.0%    | 4.3%                       | 0.0%      | 10.0% | 0.0%     |
| CT    | 1.0%  | 44.1%       | 49.0%   | 1.2%                       | 0.4%      | 0.0%  | 4.3%     |
| DC    | 0.0%  | 0.0%        | 0.0%    | 0.0%                       | 100.0%    | 0.0%  | 0.0%     |
| DE    | 19.8% | 75.9%       | 0.0%    | 0.0%                       | 0.5%      | 0.1%  | 3.7%     |
| FL    | 22.1% | 64.1%       | 9.2%    | 0.1%                       | 1.2%      | 0.0%  | 3.4%     |
| GA    | 42.5% | 25.7%       | 26.9%   | 2.4%                       | 0.4%      | 0.0%  | 2.0%     |
| HI    | 14.2% | 0.0%        | 0.0%    | 1.1%                       | 74.4%     | 3.4%  | 6.9%     |
| IA    | 64.1% | 2.7%        | 9.2%    | 2.1%                       | 0.2%      | 21.3% | 0.3%     |
| ID    | 0.5%  | 8.6%        | 0.0%    | 77.9%                      | 0.0%      | 9.4%  | 3.7%     |
| IL    | 43.1% | 4.4%        | 48.4%   | 0.1%                       | 0.0%      | 3.5%  | 0.4%     |
| IN    | 83.3% | 10.5%       | 0.0%    | 0.3%                       | 0.1%      | 2.9%  | 2.8%     |
| KS    | 68.4% | 6.5%        | 15.3%   | 0.0%                       | 0.1%      | 9.7%  | 0.0%     |
| KY    | 92.4% | 2.6%        | 0.0%    | 2.9%                       | 1.7%      | 0.0%  | 0.4%     |
| LA    | 21.5% | 53.6%       | 16.3%   | 1.0%                       | 3.9%      | 0.0%  | 3.8%     |
| MA    | 9.1%  | 67.9%       | 14.6%   | 2.9%                       | 0.5%      | 0.1%  | 4.8%     |
| MD    | 46.1% | 8.6%        | 35.0%   | 6.3%                       | 0.4%      | 0.9%  | 2.7%     |
| ME    | 0.3%  | 44.7%       | 0.0%    | 24.8%                      | 1.0%      | 5.1%  | 24.1%    |
| MI    | 50.6% | 16.7%       | 28.2%   | 1.6%                       | 0.3%      | 0.5%  | 2.1%     |
| MN    | 48.0% | 9.5%        | 22.5%   | 2.2%                       | 0.1%      | 13.9% | 3.9%     |
| MO    | 80.8% | 5.7%        | 10.5%   | 1.3%                       | 0.1%      | 1.4%  | 0.3%     |
| MS    | 16.7% | 64.5%       | 15.8%   | 0.0%                       | 0.1%      | 0.0%  | 2.9%     |
| MT    | 47.5% | 0.3%        | 0.0%    | 44.9%                      | 1.6%      | 4.4%  | 1.2%     |
| NC    | 47.8% | 12.1%       | 34.5%   | 3.6%                       | 0.2%      | 0.0%  | 1.8%     |
| ND    | 77.2% | 0.1%        | 0.0%    | 7.4%                       | 0.1%      | 15.0% | 0.2%     |
| NE    | 69.6% | 2.0%        | 19.7%   | 5.2%                       | 0.1%      | 3.3%  | 0.2%     |
| NH    | 9.1%  | 35.3%       | 40.5%   | 8.3%                       | 0.3%      | 0.6%  | 6.1%     |
| NJ    | 5.0%  | 40.4%       | 52.2%   | 0.0%                       | 0.1%      | 0.0%  | 2.3%     |
| NM    | 69.1% | 23.5%       | 0.0%    | 0.8%                       | 0.1%      | 6.0%  | 0.5%     |
| NV    | 13.3% | 69.5%       | 0.0%    | 7.6%                       | 0.0%      | 0.0%  | 9.6%     |
| NY    | 5.8%  | 38.7%       | 30.6%   | 20.0%                      | 0.7%      | 2.2%  | 2.0%     |

|                               |              |              |              |             |             |             |             |
|-------------------------------|--------------|--------------|--------------|-------------|-------------|-------------|-------------|
| OH                            | 74.0%        | 12.2%        | 11.3%        | 0.3%        | 1.0%        | 0.4%        | 0.8%        |
| OK                            | 42.7%        | 45.8%        | 0.0%         | 2.8%        | 0.0%        | 8.4%        | 0.3%        |
| OR                            | 4.4%         | 14.3%        | 0.0%         | 70.9%       | 0.0%        | 9.2%        | 1.2%        |
| PA                            | 41.7%        | 20.8%        | 33.5%        | 1.3%        | 0.2%        | 0.9%        | 1.7%        |
| RI                            | 0.0%         | 98.1%        | 0.0%         | 0.0%        | 0.1%        | 0.0%        | 1.6%        |
| SC                            | 31.9%        | 12.9%        | 51.8%        | 1.9%        | 0.1%        | 0.0%        | 1.3%        |
| SD                            | 21.4%        | 2.1%         | 0.0%         | 52.0%       | 0.1%        | 24.4%       | 0.0%        |
| TN                            | 46.6%        | 5.8%         | 35.1%        | 11.6%       | 0.2%        | 0.1%        | 0.6%        |
| TX                            | 34.0%        | 47.8%        | 9.1%         | 0.3%        | 0.2%        | 7.4%        | 1.3%        |
| UT                            | 79.3%        | 15.0%        | 0.0%         | 2.6%        | 0.1%        | 1.7%        | 1.3%        |
| VA                            | 26.4%        | 30.5%        | 38.9%        | 1.8%        | 0.7%        | 0.0%        | 1.8%        |
| VT                            | 0.0%         | 0.0%         | 71.7%        | 20.8%       | 0.0%        | 0.9%        | 6.6%        |
| WA                            | 3.3%         | 4.3%         | 5.4%         | 79.6%       | 0.0%        | 5.6%        | 1.9%        |
| WI                            | 56.5%        | 14.3%        | 19.5%        | 4.4%        | 0.8%        | 2.2%        | 2.2%        |
| WV                            | 95.6%        | 0.3%         | 0.0%         | 2.1%        | 0.2%        | 1.7%        | 0.0%        |
| WY                            | 85.5%        | 1.1%         | 0.0%         | 2.6%        | 0.1%        | 10.0%       | 0.6%        |
| <b>US-TOTAL<br/>2011-2012</b> | <b>39.8%</b> | <b>26.9%</b> | <b>19.3%</b> | <b>7.9%</b> | <b>0.6%</b> | <b>3.2%</b> | <b>2.3%</b> |
| <b>US-TOTAL<br/>2025</b>      | <b>39.2%</b> | <b>25.0%</b> | <b>20.1%</b> | <b>7.6%</b> | <b>0.6%</b> | <b>4.0%</b> | <b>3.4%</b> |

### 13. Equations for Energy Consumption, GHG Emissions, and TCO Calculations

#### 13.1. Energy Consumption

For the electric truck:

$$EC_{ET} = \frac{1}{\left\{ \sum_i \left[ \frac{\eta_{PP_i}}{1 + \left( \frac{\eta_{PP_i}}{EPR_i} \right)} \times GM_i \right] \right\} \times \eta_{TM} \times \eta_{TTW_{ET}} \times PL_{ET}} + \left\{ \frac{EC_{VM_{ET}}}{VKT_{LF} \times PL_{ET}} \right\} + \left\{ \frac{EC_B + EC_{EVSE} + EC_{B_R} + EC_{EVSE_R}}{\frac{1}{2} \times VKT_{LF} \times PL_{ET}} \right\} + \left\{ \frac{EC_{ELV_{ET}}}{VKT_{LF} \times PL_{ET}} \right\}$$

Table 14S. Electric Truck: Energy Consumption Parameters

| Parameter                                                  | Description                                                                             | Unit           | Value<br>(Baseline – Table 2) |             |
|------------------------------------------------------------|-----------------------------------------------------------------------------------------|----------------|-------------------------------|-------------|
| $i$                                                        | $i$ -th generation fuel                                                                 | -              | -                             | Table 2     |
| $\eta_{PP_i}$                                              | Power plant's electricity generation efficiency                                         | %              | -                             | Section 2.3 |
| $EPR_i$                                                    | Energy payback ratio                                                                    | %              | -                             |             |
| $GM_i$                                                     | Generation mix                                                                          | %              | -                             |             |
| $\eta_{TM}$                                                | Electric grid transmission efficiency                                                   | %              | 93                            | Table 2     |
| $\eta_{TTW_{ET}}$                                          | TTW efficiency of the electric truck                                                    | km/MJ          | 0.357                         |             |
| $PL_{ET}$                                                  | Payload of the electric truck                                                           | t              | 3.23                          | Table 1     |
| Total operational energy consumption of the electric truck |                                                                                         | MJ/t·km        | 2.34                          | Table 2     |
| $EC_{VM_{ET}}$                                             | Energy consumption for vehicle (electric truck) manufacture                             | MJ             | 487,000                       | Figure 2S   |
| $EC_B$                                                     | Energy consumption for Li-Ion battery production                                        |                | 128,000                       |             |
| $EC_{EVSE}$                                                | Energy consumption for EVSE production                                                  |                | 4,290                         | Section 2.4 |
| $EC_{B_R}$                                                 | Energy consumption for Li-Ion battery replacement                                       |                | 128,000                       | Figure 2S   |
| $EC_{EVSE_R}$                                              | Energy consumption for EVSE replacement                                                 |                | 4,290                         | Section 2.4 |
| $EC_{ELV_{ET}}$                                            | Net energy consumption of end-of-life vehicle recycling of the electric truck           |                | -122,000                      |             |
| $VKT_{LF}$                                                 | Lifetime VKT                                                                            | km             | 240,000                       | Section 2.5 |
| $\frac{1}{2} \times VKT_{LF}$                              | Li-Ion battery and EVSE are assumed to be replaced after 120,000 km in energy use model | km             | 120,000                       | -           |
| $EC_{ET}$                                                  | <b>Total life-cycle energy consumption of the electric truck</b>                        | <b>MJ/t·km</b> | <b>3.49</b>                   | -           |

For the diesel truck:

$$EC_{DT} = \left\{ \frac{1}{\eta_{UP} \times \eta_{TTW_{DT}} \times PL_{DT}} \right\} + \left\{ \frac{EC_{VM_{DT}} + EC_{ELV_{DT}}}{VKT_{LF} \times PL_{DT}} \right\}$$

Table 15S. Diesel Truck: Energy Consumption Parameters

| Parameter                                                | Description                                                                 | Unit           | Value<br>(Baseline – Table 2) |             |
|----------------------------------------------------------|-----------------------------------------------------------------------------|----------------|-------------------------------|-------------|
| $\eta_{UP}$                                              | Aggregate upstream efficiency                                               | %              | 87.3                          | Table 2     |
| $\eta_{TTW_{DT}}$                                        | TTW efficiency of the diesel truck                                          | km/MJ          | 0.093                         |             |
| $PL_{DT}$                                                | Payload of the diesel truck                                                 | t              | 2.86                          | Table 1     |
| Total operational energy consumption of the diesel truck |                                                                             | MJ/t·km        | 4.3                           | Table 2     |
| $EC_{VM_{DT}}$                                           | Energy consumption for vehicle (diesel truck) manufacture                   | MJ             | 540,000                       | Table 3S    |
| $EC_{ELV_{DT}}$                                          | Net energy consumption of end-of-life vehicle recycling of the diesel truck |                | -135,000                      | Section 2.4 |
| $EC_{DT}$                                                | <b>Total life-cycle energy consumption of the diesel truck</b>              | <b>MJ/t·km</b> | <b>4.9</b>                    | -           |

### 13.2. GHG Emissions

For the electric truck:

$$GHG_{ET} = \frac{\{\sum_i [GHG_{LC_i} \times GM_i]\}}{\eta_{TM} \times \eta_{TTW_{ET}} \times PL_{ET}} + \left\{ \frac{GHG_{VM_{ET}}}{VKT_{LF} \times PL_{ET}} \right\} + \left\{ \frac{GHG_B + GHG_{EVSE} + GHG_{BR} + GHG_{EVSE_R}}{\frac{1}{2} \times VKT_{LF} \times PL_{ET}} \right\} + \left\{ \frac{GHG_{ELV_{ET}}}{VKT_{LF} \times PL_{ET}} \right\}$$

Table 16S. Electric Truck: GHG Emissions Parameters

| Parameter                                             | Description                                                                                | Unit                                | Value<br>(Baseline – Table 2) |             |
|-------------------------------------------------------|--------------------------------------------------------------------------------------------|-------------------------------------|-------------------------------|-------------|
| $i$                                                   | $i$ -th generation fuel                                                                    | -                                   | -                             | Table 2     |
| $GHG_{LC_i}$                                          | GHG emissions from power plant's electricity generation                                    | kgCO <sub>2</sub> e/MJ <sub>e</sub> | -                             |             |
| $GM_i$                                                | Generation mix                                                                             | %                                   | -                             |             |
| $\eta_{TM}$                                           | Electric grid transmission efficiency                                                      | %                                   | 93                            |             |
| $\eta_{TTW_{ET}}$                                     | TTW efficiency of the electric truck                                                       | km/MJ <sub>e</sub>                  | 0.357                         |             |
| $PL_{ET}$                                             | Payload of the electric truck                                                              | t                                   | 3.23                          | Table 1     |
| Total operational GHG Emissions of the electric truck |                                                                                            | kgCO <sub>2</sub> e/t·km            | 0.15                          | Table 2     |
| $GHG_{VM_{ET}}$                                       | GHG emissions from vehicle (electric truck) manufacture                                    | kgCO <sub>2</sub> e                 | 27,400                        | Figure 2S   |
| $GHG_B$                                               | GHG emissions from Li-Ion battery production                                               |                                     | 11,300                        | Section 2.4 |
| $GHG_{EVSE}$                                          | GHG emissions from EVSE production                                                         |                                     | 250                           |             |
| $GHG_{BR}$                                            | GHG emissions from Li-Ion battery replacement                                              |                                     | 11,300                        | Figure 2S   |
| $GHG_{EVSE_R}$                                        | GHG emissions from EVSE replacement                                                        |                                     | 250                           | Section 2.4 |
| $GHG_{ELV_{ET}}$                                      | Net GHG emissions from end-of-life vehicle recycling of the electric truck                 |                                     | -4,660                        |             |
| $VKT_{LF}$                                            | Lifetime VKT                                                                               | km                                  | 240,000                       | Section 2.5 |
| $\frac{1}{2} \times VKT_{LF}$                         | Li-Ion battery and EVSE are assumed to be replaced after 120,000 km in GHG emissions model | km                                  | 120,000                       | -           |
| $GHG_{ET}$                                            | Total life-cycle GHG emissions from the electric truck                                     | kgCO <sub>2</sub> e/t·km            | 0.24                          | -           |

For the diesel truck:

$$GHG_{DT} = \frac{GHG_{LCD}}{\eta_{TTW_{DT}} \times PL_{DT}} + \left\{ \frac{GHG_{VM_{DT}} + GHG_{ELV_{DT}}}{VKT_{LF} \times PL_{DT}} \right\}$$

Table 17S. Diesel Truck: GHG Emissions Parameters

| Parameter                                                | Description                                                              | Unit                          | Value<br>(Baseline – Table 2) |             |
|----------------------------------------------------------|--------------------------------------------------------------------------|-------------------------------|-------------------------------|-------------|
| $GHG_{LCD}$                                              | Life-cycle GHG emissions of diesel fuel                                  | kgCO <sub>2</sub> e/MJ        | 0.09                          | Table 2     |
| $\eta_{TTW_{DT}}$                                        | TTW efficiency of the diesel truck                                       | km/MJ                         | 0.093                         |             |
| $PL_{DT}$                                                | Payload of the diesel truck                                              | t                             | 2.86                          | Table 1     |
| Total operational energy consumption of the diesel truck |                                                                          | kgCO <sub>2</sub> e/t·km      | 0.34                          | Table 2     |
| $GHG_{VM_{DT}}$                                          | GHG emissions from vehicle (diesel truck) manufacture                    | kgCO <sub>2</sub> e           | 36,000                        | Table 3S    |
| $GHG_{ELV_{DT}}$                                         | Net GHG emissions from end-of-life vehicle recycling of the diesel truck |                               | -6,100                        | Section 2.4 |
| <b><math>GHG_{DT}</math></b>                             | <b>Total life-cycle GHG emissions from the diesel truck</b>              | <b>kgCO<sub>2</sub>e/t·km</b> | <b>0.38</b>                   | -           |

### 13.3. TCO (for baseline case in Figure 4)

$$TCO_{ij} = P_{P_{ij}} + \left\{ \frac{P_{F_{ij}} \times VKT}{\eta_{PT_i}} \right\} + \{C_{M_i} \times VKT\} + \{P_{B_{ij}} \times BC_i \times R_{B_{ij}}\} + \{P_{EVSE_{ij}} \times L_{EVSE_i} \times R_{EVSE_{ij}}\}$$

Table 18S. TCO Parameters

| Parameter     | Description                                           | Unit   | Value                                                                      |                                                                                              |
|---------------|-------------------------------------------------------|--------|----------------------------------------------------------------------------|----------------------------------------------------------------------------------------------|
|               |                                                       |        | Diesel truck<br>$i = 0$                                                    | Electric Truck<br>$i = 1$                                                                    |
| $j$           | $j$ -th year                                          | -      | from 0 to 11 – 20<br>$j = 0$ : only for upfront costs<br>(see Section 2.5) |                                                                                              |
| $TCO_{ij}$    | Total cost of ownership for $j$ -th year              | \$     | -                                                                          | -                                                                                            |
| $P_{P_{ij}}$  | Purchase price of the GVW class 5 truck               | \$     | 60,000                                                                     | 85,000 – 97,000                                                                              |
|               |                                                       |        | 0 when $j \neq 0$                                                          |                                                                                              |
| $P_{F_{ij}}$  | Fuel price                                            | \$/gal | 4 scenarios<br>(Figure 5S)                                                 | -                                                                                            |
|               |                                                       | \$/kWh | -                                                                          | 2 scenarios<br>(Figure 5S)                                                                   |
| $VKT$         | Annual vehicle kilometers traveled<br>(travel demand) | km     | 48 – 96<br>(x 20 days per month x 12 months)                               |                                                                                              |
| $\eta_{PT_i}$ | Powertrain energy efficiency                          | km/gal | 12.8 – 14.3                                                                | -                                                                                            |
|               |                                                       | km/kWh | -                                                                          | 1.03 – 1.54                                                                                  |
| $C_{M_i}$     | Maintenance cost per unit distance<br>traveled        | \$/km  | 0.139                                                                      | 0.035 – 0.069                                                                                |
| $P_{B_{ij}}$  | Battery price                                         | \$/kWh | 0                                                                          | 625 in 2011<br>230 in 2020                                                                   |
| $BC_i$        | Battery capacity                                      | kWh    | -                                                                          | 80                                                                                           |
| $R_{B_{ij}}$  | Battery replacement                                   | -      | -                                                                          | 0 or 1 ( $R_{B_{ij}} = 1$<br>for randomly<br>selected $j$<br>between 6 – 10:<br>Section 2.5) |



|                 |                  |    |   |                                                                                                      |
|-----------------|------------------|----|---|------------------------------------------------------------------------------------------------------|
| $P_{EVSE_{ij}}$ | EVSE price       | \$ | 0 | 0 for Level 1<br>1,860 – 14,400<br>in 2011<br>1,000 – 7,000<br>in 2017<br>for Level 2                |
| $L_{EVSE_i}$    | EVSE Level       | -  | - | Level 1 or 2                                                                                         |
| $R_{EVSE_{ij}}$ | EVSE replacement | -  | - | 0 or 1 ( $R_{B_{ij}} = 1$<br>for $j = 16$ for<br>Level 1 and $j =$<br>7 for Level 2<br>(Section 2.5) |

## 14. Sensitivity Analysis for Energy Consumption and GHG Emissions

We consider that the energy consumption and GHG emissions calculations are basically linear, with limited interaction and/or non-linearity. As shown in the formula below, we increase by 5% each of the independent variables, one at a time, to evaluate the difference in the total life-cycle energy consumption and GHG emissions. Even though we assumed no interaction between independent variables, changing any of the electricity generation fuel's proportion/contribution entails inevitable adjustment of the other generation fuels so that the total remains 100%. Thus, when we change one of the generation fuel's contribution (e.g., from 10% to 10.5%) for sensitivity analysis, we decrease the other five generation fuels' contributions (e.g.,  $0.5\% \times 0.2\%$ ) evenly and proportionally to the difference. Also, the 5% increase doesn't apply to battery replacement; the replacement is either 0 or 1.

$$\text{Sensitivity (\%)} = \left| \frac{[f_{\text{diesel}}(x) - f_{\text{electric}}(x)]|_{x=(x_0+5\% \times x_0)} - [f_{\text{diesel}}(x) - f_{\text{electric}}(x)]|_{x=x_0}}{[f_{\text{diesel}}(x) - f_{\text{electric}}(x)]|_{x=x_0}} \right|$$

Table 19S. Energy Use and GHG Emissions Sensitivity Analysis Result (Sorted from Largest to Smallest)

| Independent Variables            | Energy Use | Independent Variables            | GHG  |
|----------------------------------|------------|----------------------------------|------|
| Battery Replacement              | 82%        | Battery Replacement              | 34%  |
| DT TTW Energy Consumption        | 53%        | DT TTW Energy Consumption        | 20%  |
| Diesel Fuel Upstream Efficiency  | 51%        | Diesel Fuel LC GHG Emissions     | 20%  |
| ET TTW Energy Consumption        | 41%        | ET TTW Energy Consumption        | 12%  |
| Transmission Efficiency          | 39%        | Transmission Efficiency          | 12%  |
| Coal Power Plant Efficiency      | 12%        | Coal LC GHG Emissions            | 9%   |
| NG Power Plant Efficiency        | 10%        | Coal Generation Mix              | 6%   |
| Battery Production Energy Use    | 8%         | Battery Production GHG Emissions | 3%   |
| DT Manufacture Energy Use        | 7%         | NG LC GHG Emissions              | 3%   |
| Hydro Power Plant Efficiency     | 7%         | DT Manufacture GHG Emissions     | 3%   |
| Coal Generation Mix              | 7%         | Nuclear Generation Mix           | 2%   |
| Nuclear Power Plant Efficiency   | 6%         | ET Manufacture GHG Emissions     | 2%   |
| ET Manufacture Energy Use        | 6%         | NG Generation Mix                | 1%   |
| Hydro Generation Mix             | 4%         | Hydro Generation Mix             | 1%   |
| Nuclear Generation Mix           | 3%         | Other Generation Mix             | 1%   |
| Other Power Plant Efficiency     | 3%         | Recycling                        | < 1% |
| NG Generation Mix                | 1%         | Nuclear LC GHG Emissions         |      |
| NG EPR                           | 1%         | Petroleum LC GHG Emissions       |      |
| Coal EPR                         | 1%         | Petroleum Generation Mix         |      |
| Recycling                        | < 1%       | EVSE GHG Emissions               |      |
| Petroleum Power Plant Efficiency |            | Other LC GHG Emissions           |      |
| EVSE Energy Use                  |            | Hydro LC GHG Emissions           |      |
| Nuclear EPR                      |            | Coal EPR                         |      |
| Petroleum Generation Mix         |            | NG EPR                           |      |
|                                  |            |                                  |      |

|                                  |  |                                  |  |
|----------------------------------|--|----------------------------------|--|
| Other Generation Mix             |  | Nuclear EPR                      |  |
| Other EPR                        |  | Hydro EPR                        |  |
| Hydro EPR                        |  | Petroleum EPR                    |  |
| Petroleum EPR                    |  | Other EPR                        |  |
| Coal LC GHG Emissions            |  | Coal Power Plant Efficiency      |  |
| NG LC GHG Emissions              |  | NG Power Plant Efficiency        |  |
| Nuclear LC GHG Emissions         |  | Nuclear Power Plant Efficiency   |  |
| Hydro LC GHG Emissions           |  | Hydro Power Plant Efficiency     |  |
| Petroleum LC GHG Emissions       |  | Petroleum Power Plant Efficiency |  |
| Other LC GHG Emissions           |  | Other Power Plant Efficiency     |  |
| ET Manufacture GHG Emissions     |  | ET Manufacture Energy Use        |  |
| Battery Production GHG Emissions |  | Battery Production Energy Use    |  |
| EVSE GHG Emissions               |  | EVSE Energy Use                  |  |
| Diesel Fuel LC GHG Emissions     |  | Diesel Fuel Upstream Efficiency  |  |
| DT Manufacture GHG Emissions     |  | DT Manufacture Energy Use        |  |

## 15. Regression Analysis Result for TCO Sensitivity Analysis

$$\begin{aligned}
 NPV = & \beta_0 + \beta_1 \times \{Fuel\ Price\ Scenario \times VKT \times Fuel\ Consumption\} \\
 & + \beta_2 \times \{Battery\ Replacement\ Scenario \times Battery\ Price\} \\
 & + \beta_3 \times \{EVSE\ Level \times EVSE\ Price\} + \beta_4 \times Discount\ Rate \\
 & + \beta_5 \times Purchase\ Price\ Differential + \beta_6 \times Electric\ Powertrain\ Efficiency \\
 & + \beta_7 \times Maintenance\ Cost\ Differential + \beta_8 \times Electricity\ Price\ Scenario
 \end{aligned}$$

Table 20S. Linear Regression Result

| (Number of samples: 10 <sup>5</sup> )          | Coefficient          |                       | Standard Error       | Standardized |                      |                       |
|------------------------------------------------|----------------------|-----------------------|----------------------|--------------|----------------------|-----------------------|
|                                                |                      |                       |                      | Coefficient  | t                    | Pr(> t )              |
| Intercept                                      | $\beta_0$            | 2.6x10 <sup>4</sup>   | 1.9x10 <sup>2</sup>  | 0            | 1.4x10 <sup>2</sup>  | 1                     |
| Fuel Price Scenario, VKT, and Fuel Consumption | $\beta_1$            | 4.4x10 <sup>0</sup>   | 7.4x10 <sup>-3</sup> | <b>0.5</b>   | 6.0x10 <sup>2</sup>  | <2x10 <sup>-16b</sup> |
| Battery Replacement Scenario and Battery Price | $\beta_2$            | -2.1x10 <sup>1</sup>  | 3.6x10 <sup>-2</sup> | <b>-0.48</b> | -5.8x10 <sup>2</sup> |                       |
| EVSE Level and EVSE Price                      | $\beta_3$            | -6.4x10 <sup>-1</sup> | 1.2x10 <sup>-3</sup> | <b>-0.44</b> | -5.2x10 <sup>2</sup> |                       |
| Discount Rate                                  | $\beta_4$            | -2.1x10 <sup>5</sup>  | 4.1x10 <sup>2</sup>  | <b>-0.42</b> | -5.0x10 <sup>2</sup> |                       |
| Purchase Price Differential <sup>a</sup>       | $\beta_5$            | 1.0x10 <sup>0</sup>   | 3.4x10 <sup>-3</sup> | <b>0.25</b>  | 3.0x10 <sup>2</sup>  |                       |
| Electric Powertrain Efficiency                 | $\beta_6$            | 1.0x10 <sup>4</sup>   | 8.0x10 <sup>1</sup>  | <b>0.1</b>   | 1.2x10 <sup>2</sup>  |                       |
| Maintenance Cost Differential <sup>a</sup>     | $\beta_7$            | 1.3x10 <sup>5</sup>   | 1.2x10 <sup>3</sup>  | <b>0.09</b>  | 1.1x10 <sup>2</sup>  |                       |
| Electricity Price Scenario                     | $\beta_8$            | -6.1x10 <sup>2</sup>  | 2.4x10 <sup>1</sup>  | <b>-0.02</b> | -2.6x10 <sup>1</sup> |                       |
| R <sup>2</sup>                                 | 0.93                 |                       |                      |              |                      |                       |
| Adjusted R <sup>2</sup>                        | 0.93                 |                       |                      |              |                      |                       |
| F-Statistic                                    | 1.66x10 <sup>5</sup> |                       |                      |              |                      |                       |

<sup>a</sup> Difference between the diesel truck and electric truck. <sup>b</sup> At a 5% significance level.

## 16. Electricity Transmission and Distribution Efficiency (59)

| (Million Kilowatthours)                |                                               | 2004      | 2005      | 2006      | 2007      | 2008      | 2009      | 2010      |
|----------------------------------------|-----------------------------------------------|-----------|-----------|-----------|-----------|-----------|-----------|-----------|
| Supply                                 | Electric Utilities                            | 2,505,231 | 2,474,846 | 2,483,656 | 2,504,131 | 2,475,367 | 2,372,776 | 2,471,632 |
|                                        | Independent Power Producers                   | 1,118,870 | 1,246,971 | 1,259,062 | 1,323,856 | 1,332,068 | 1,277,916 | 1,338,712 |
|                                        | Combined Heat and Power, Electric             | 184,259   | 180,375   | 165,359   | 177,356   | 166,915   | 159,146   | 162,042   |
|                                        | Electric Power Sector Generation Subtotal     | 3,808,360 | 3,902,192 | 3,908,077 | 4,005,343 | 3,974,349 | 3,809,837 | 3,972,386 |
|                                        | Combined Heat and Power, Commercial           | 8,270     | 8,492     | 8,371     | 8,273     | 7,926     | 8,165     | 8,592     |
|                                        | Combined Heat and Power, Industrial           | 153,925   | 144,739   | 148,254   | 143,128   | 137,113   | 132,329   | 144,082   |
|                                        | Industrial and Commercial Generation Subtotal | 162,195   | 153,231   | 156,625   | 151,401   | 145,039   | 140,494   | 152,674   |
|                                        | Total Net Generation                          | 3,970,555 | 4,055,423 | 4,064,702 | 4,156,745 | 4,119,388 | 3,950,331 | 4,125,060 |
|                                        | Total International Imports                   | 34,210    | 43,929    | 42,691    | 51,396    | 57,019    | 52,191    | 45,083    |
|                                        | Total Supply                                  | 4,004,765 | 4,099,352 | 4,107,394 | 4,208,140 | 4,176,407 | 4,002,522 | 4,170,143 |
| Disposition                            | Full Service Providers                        | 3,317,635 | 3,412,721 | 3,438,337 | 3,468,018 | 3,433,681 | 3,288,951 | 3,364,990 |
|                                        | Energy-Only Providers                         | 222,027   | 237,055   | 219,185   | 282,538   | 285,714   | 295,226   | 379,277   |
|                                        | Facility Direct Retail Sales                  | 7,817     | 11,193    | 12,397    | 14,004    | 13,567    | 12,689    | 10,226    |
|                                        | Total Electric Industry Retail Sales          | 3,547,479 | 3,660,969 | 3,669,919 | 3,764,561 | 3,732,962 | 3,596,865 | 3,754,493 |
|                                        | Direct Use                                    | 168,470   | 150,016   | 146,927   | 125,670   | 132,197   | 126,938   | 134,554   |
|                                        | Total International Exports                   | 22,898    | 19,151    | 24,271    | 20,144    | 24,198    | 18,138    | 19,106    |
|                                        | Estimated Losses                              | 265,918   | 269,217   | 266,277   | 297,766   | 287,050   | 260,581   | 261,990   |
|                                        | Total Disposition                             | 4,004,765 | 4,099,352 | 4,107,394 | 4,208,140 | 4,176,407 | 4,002,522 | 4,170,143 |
| Transmission and Distribution Loss (%) |                                               | 6.9%      | 6.8%      | 6.7%      | 7.3%      | 7.1%      | 6.7%      | 6.5%      |

## 17. Spatio-Temporal Variations of Energy Consumption and GHG Emissions

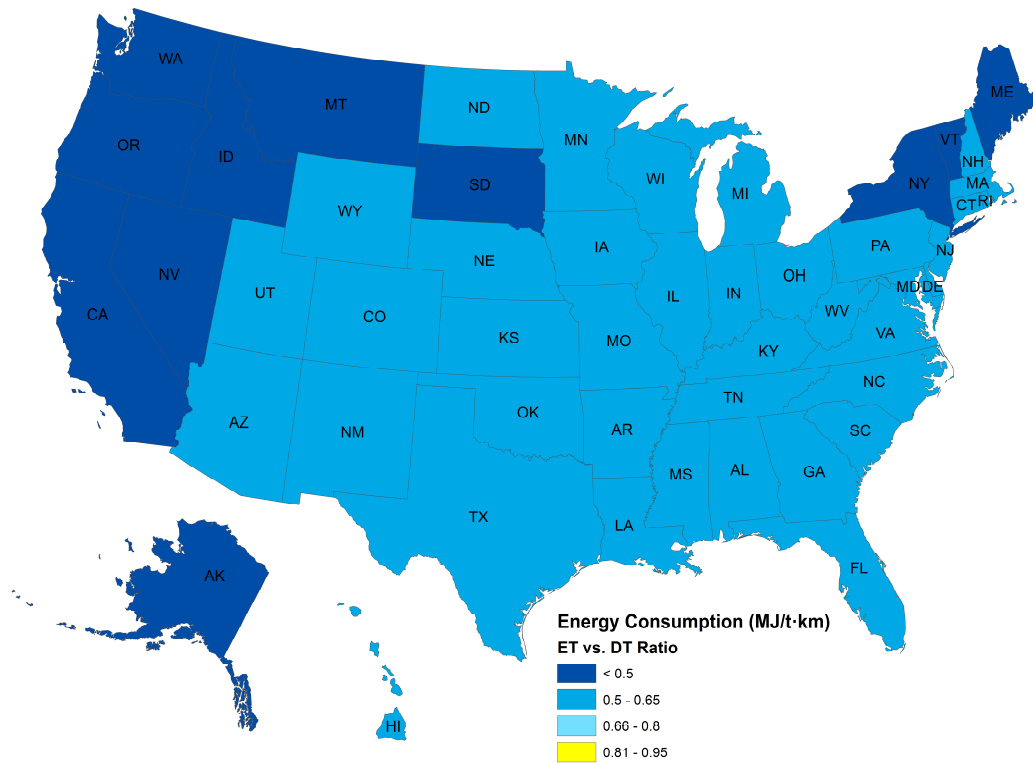

(a) Energy consumption (electric truck vs. diesel truck) – NYCC

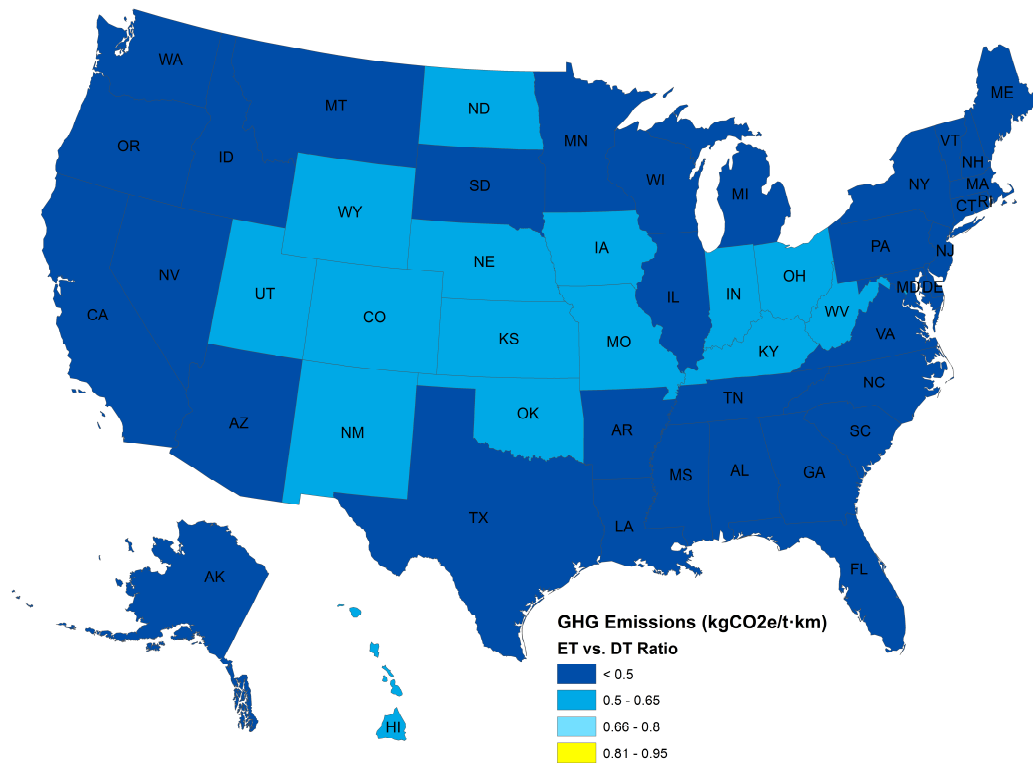

(b) GHG emissions (electric truck vs. diesel truck) – NYCC

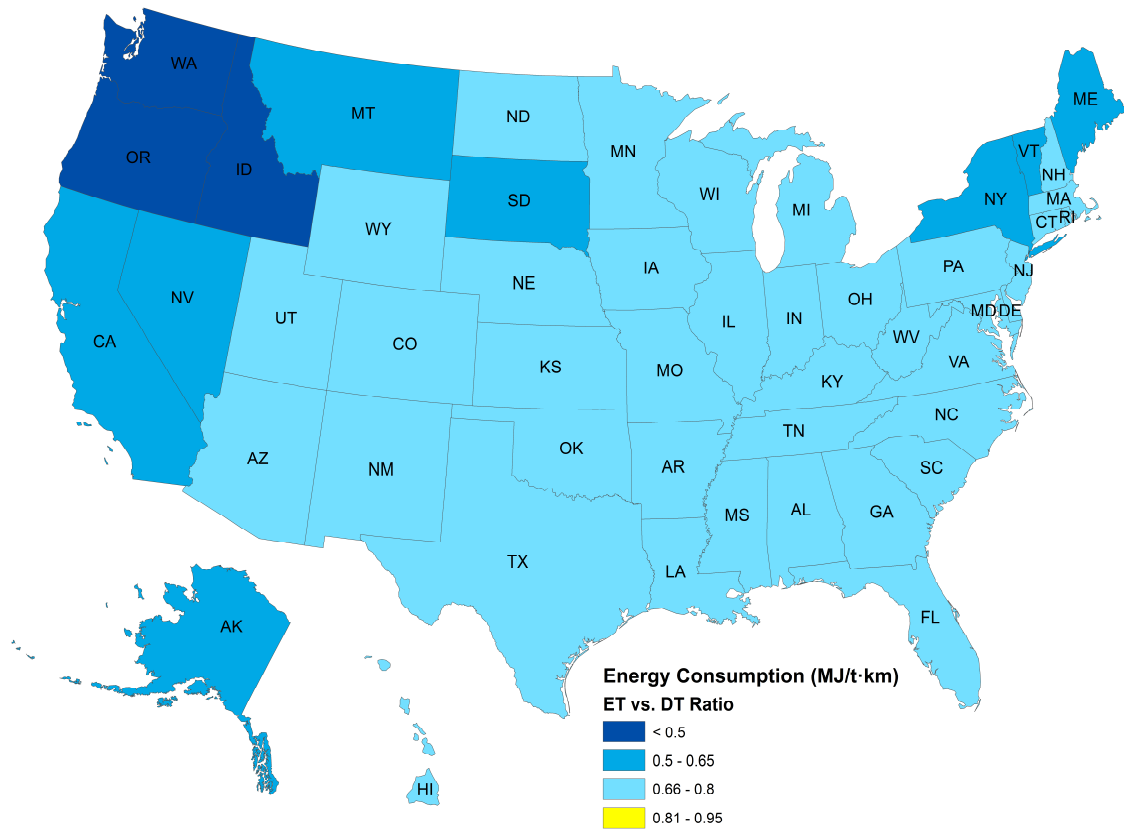

(c) Energy consumption (electric truck vs. diesel truck) – OCTA

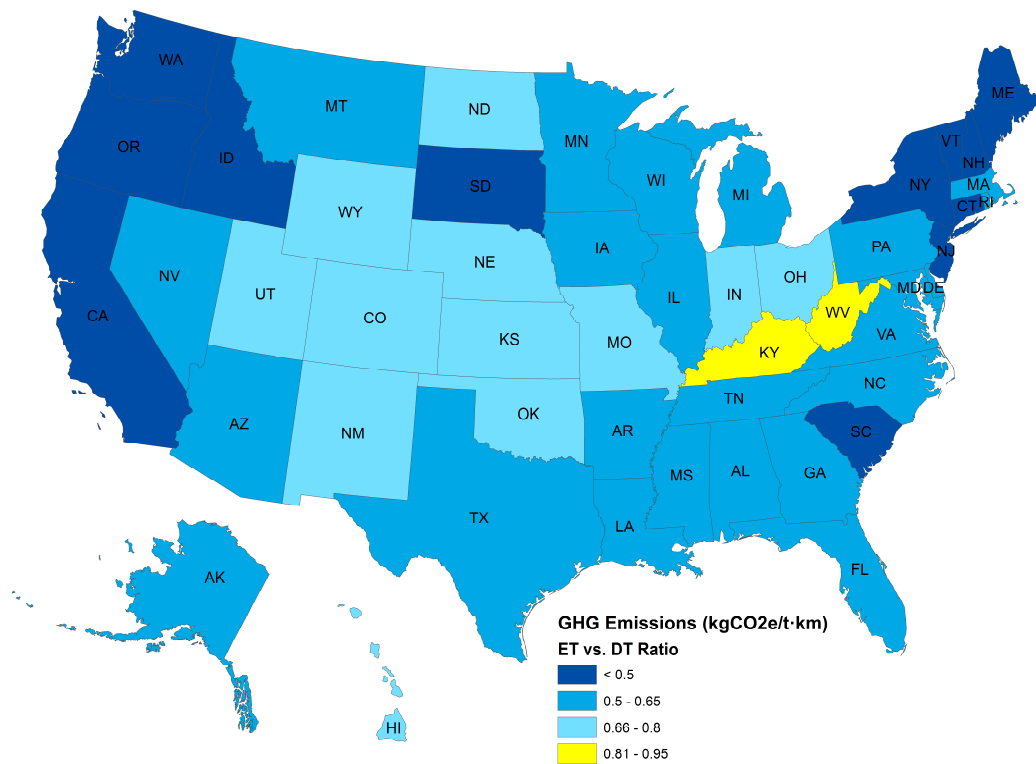

(d) GHG emissions (electric truck vs. diesel truck) - OCTA

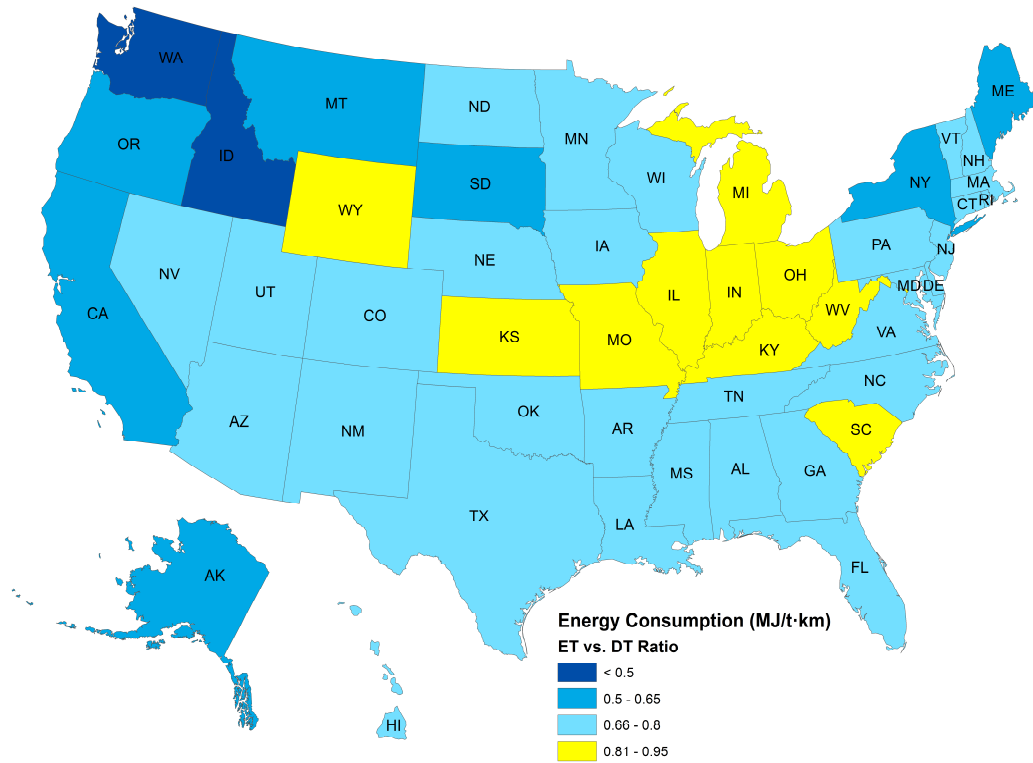

(e) Energy consumption (electric truck vs. diesel truck) – CSHVC

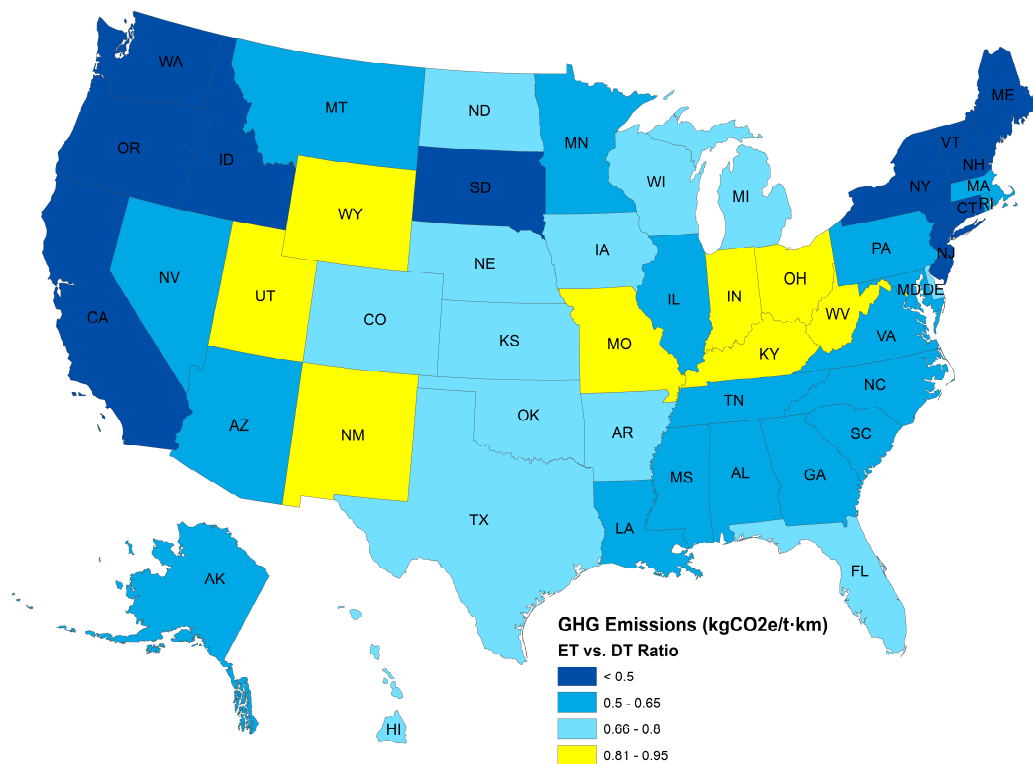

(f) GHG emissions (electric truck vs. diesel truck) - CSHVC

Figure 7S. Spatial variation of energy consumption and GHG emissions.



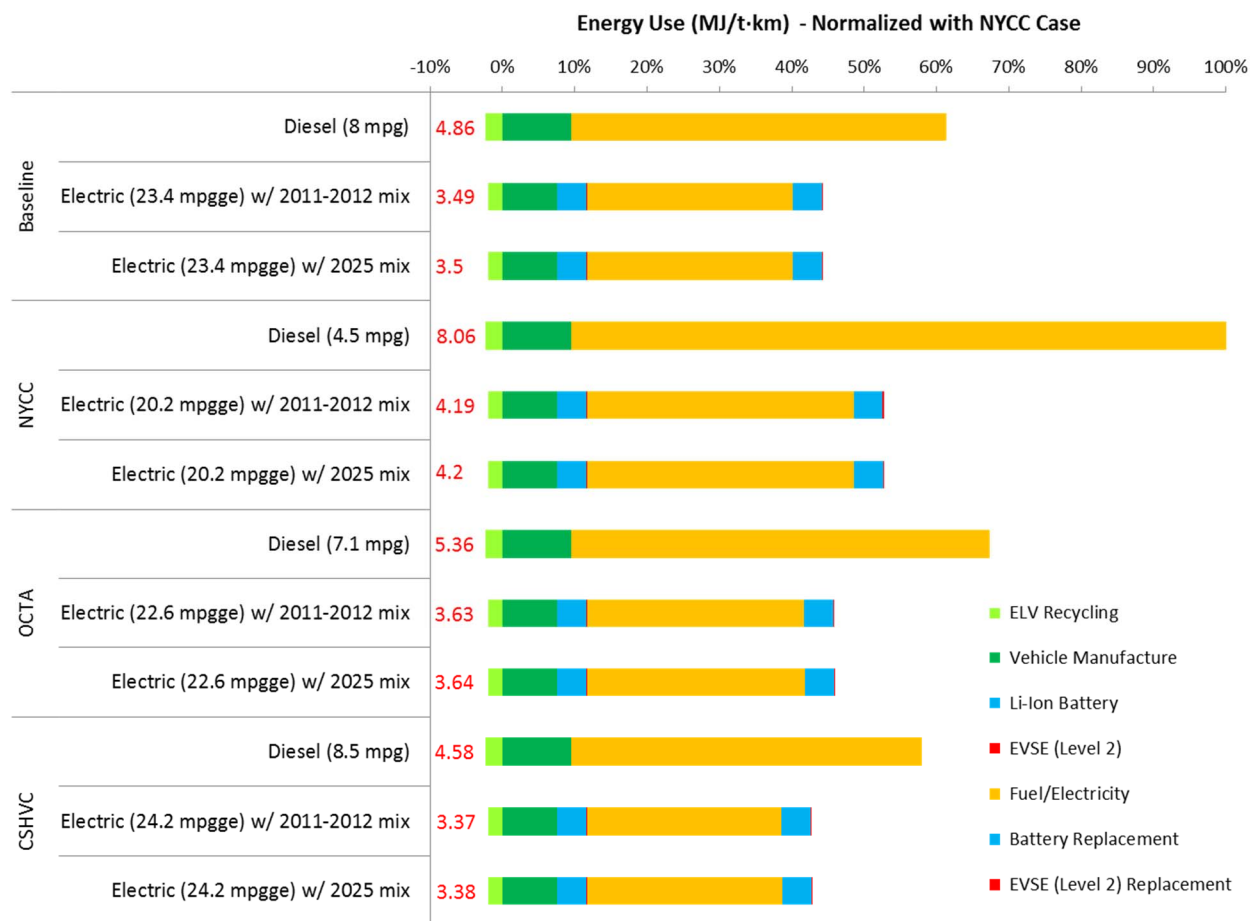

(a) Energy consumption

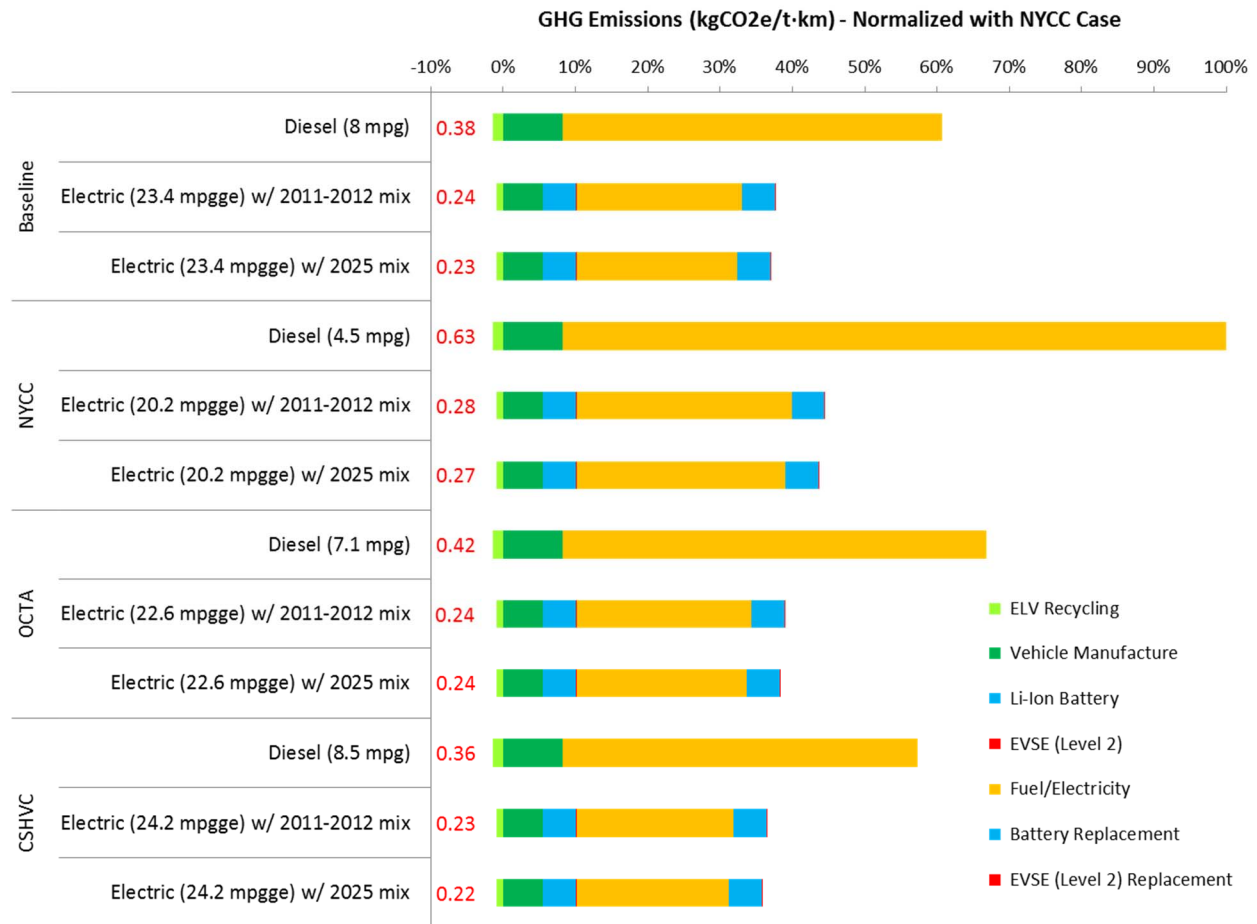

(b) GHG emissions

Figure 8S. Temporal variation of energy consumption and GHG emissions with 2011-2012 and 2025 generation mix.

## 18. Total Cost of Ownership (TCO) Uncertainty Analysis – Additional Charts

In addition to the NPV distribution chart for the TCO differential for the diesel and electric trucks in the main manuscript (Figure 4), here we present more detailed charts showing the TCO of the diesel and electric trucks separately.

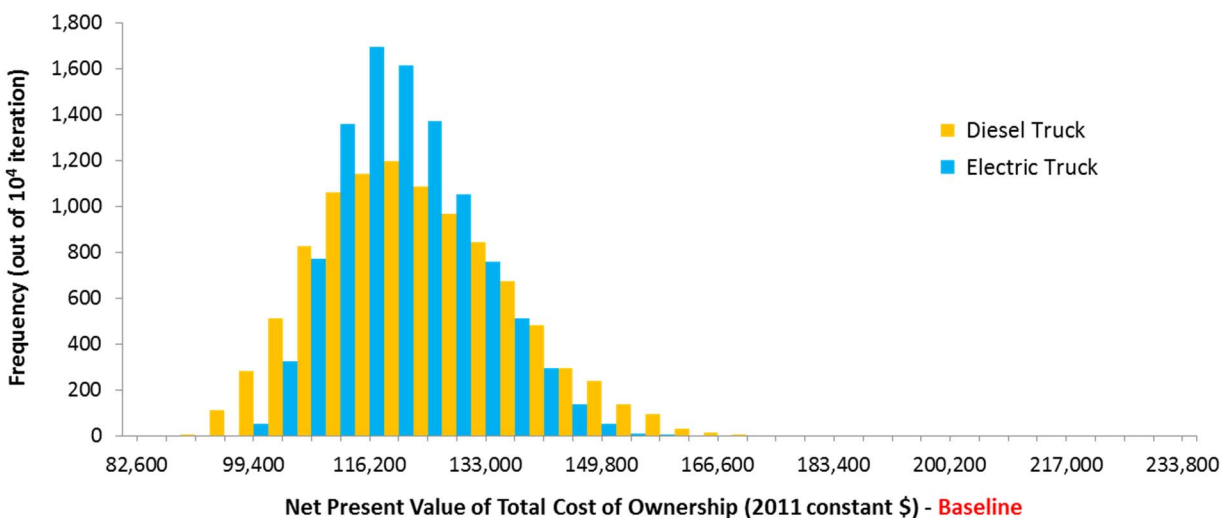

(a) Baseline

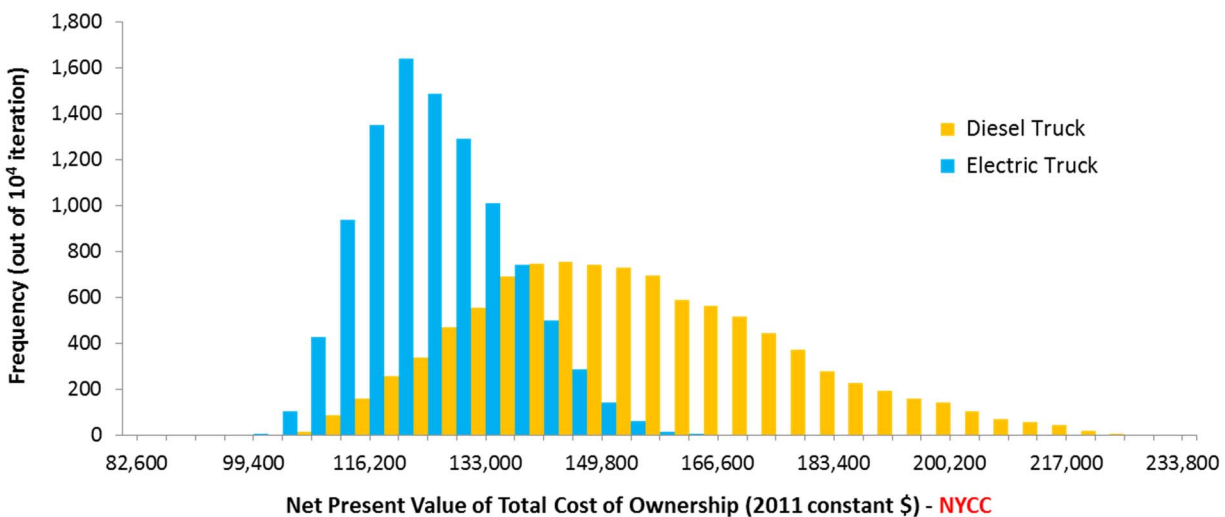

(b) NYCC

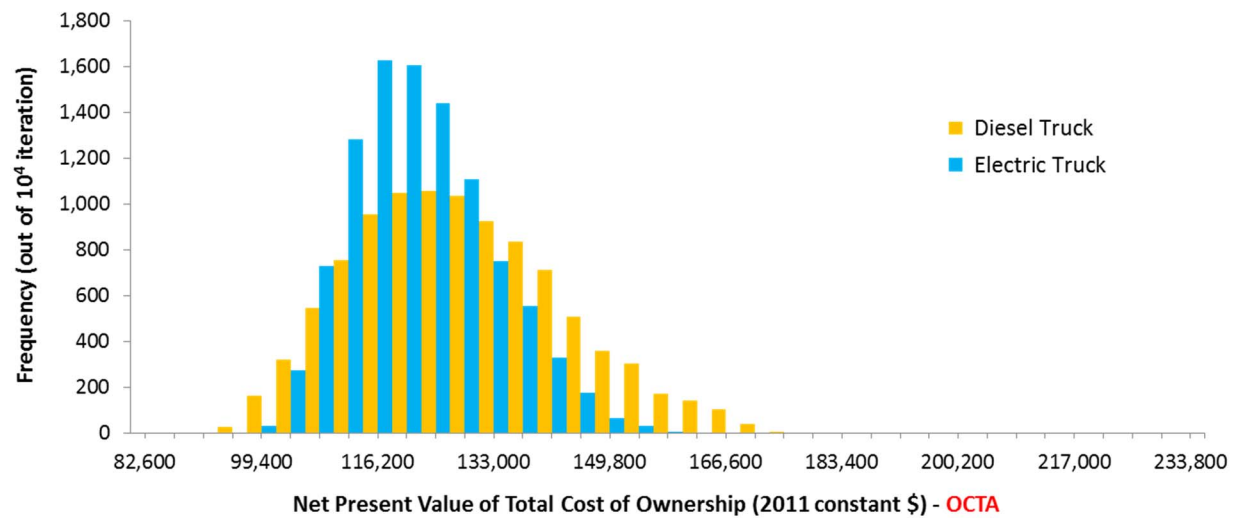

(c) OCTA

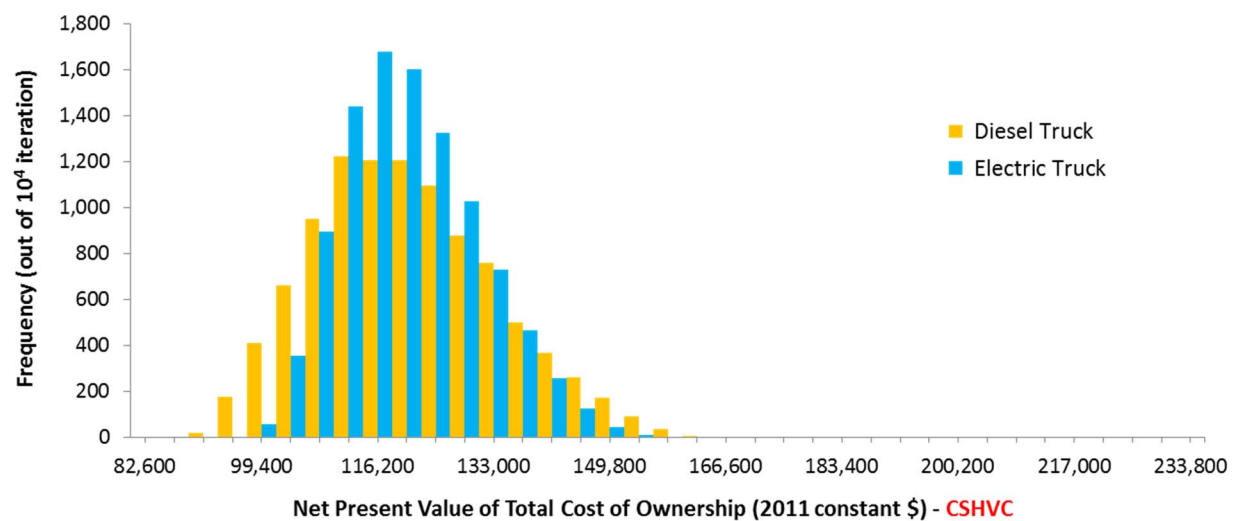

(d) CSHVC

Figure 9S. NPV distribution for different drive cycles based on Monte Carlo simulation.

## References

- (1) *Assumptions to the Annual Energy Outlook 2012*; U.S. DOE, Energy Information Administration: Washington D.C.; <http://www.eia.gov/forecasts/aeo/assumptions> (accessed December 10, 2012).
- (2) *FedEx Express Gasoline Hybrid Electric Delivery Truck Evaluation: 12-Month Report*; U.S. DOE, National Renewable Energy Laboratory: Golden, CO, 2011.
- (3) O’Keefe, M. P.; Simpson, A.; Kelly, K. J.; Pedersen, D. S. Duty Cycle Characterization and Evaluation towards Heavy Hybrid Vehicle Applications. *2007 SAE World Congress and Exhibition*, 16-19 April, Detroit, Michigan: SAE 2007-01-0302.
- (4) Future Automotive Systems Technology Simulator (FASTSim); U.S. DOE, National Renewable Energy Laboratory, 2012; <http://www.nrel.gov/vehiclesandfuels/vsa/fastsim.html> (accessed January 20, 2013).
- (5) *Vehicle Technologies Program – Smith Newton Vehicle Performance Evaluation*; U.S. DOE, National Renewable Energy Laboratory, 2013;  
<http://www.nrel.gov/docs/fy13osti/58108.pdf> (accessed April 15, 2013).
- (6) Smith Electric Vehicles. Technical Specifications; <http://www.smithelectricvehicles.com> (accessed June 15, 2011).
- (7) Estima, J.; Cardoso, A. Efficiency Analysis of Drive Train Topologies Applied to Electric/Hybrid Vehicles. *IEEE Transactions on Vehicular Technology*. **2012**, 61(3), 1021-1031.
- (8) Melfi, M.; Evon, S.; McElveen, R. Induction versus permanent magnet motor for power density and energy savings in industrial applications. *IEEE Industry Applications Magazine*. **2009**, 15(6), 28-35.
- (9) van Vliet, O.; Brouwer, A. S.; Kuramochi, T.; van den Broek, M.; Faaij, A. Energy use, cost and CO2 emissions of electric cars. *Journal of Power Sources*. **2011**, 196(4), 2298-2310.
- (10) *Annual Energy Outlook 2011*; U.S. DOE, Energy Information Administration: Washington, D.C., 2011.

- (11) Jaramillo, P.; Griffin, W. M.; Matthews, H. S. Comparative Life-Cycle Air Emissions of Coal, Domestic Natural Gas, LNG, and SNG for Electricity Generation. *Environmental Science and Technology*. **2007**, 41, 6290-6.
- (12) *Economic Input-Output Life Cycle Assessment (EIO-LCA) US 2002 (428) Model*; Carnegie Mellon University Green Design Institute; [www.eiolca.net](http://www.eiolca.net) (accessed April 23, 2012).
- (13) Motavalli, J. Frito-Lay Adds Electric Trucks to Its Fleet. *The New York Times*, September 8, 2010; <http://wheels.blogs.nytimes.com/2010/09/08/frito-lay-adds-electric-trucks-to-its-fleet> (accessed June 20, 2011).
- (14) *2011 Model Year Alternative Fuel Vehicle (AFV) Guide*; U.S. General Services Administration, 2011; [www.gsa.gov/graphics/fas/2011afvs.pdf](http://www.gsa.gov/graphics/fas/2011afvs.pdf) (accessed July 25, 2012).
- (15) *Consumer Price Index Databases 2012*; U.S. Department of Labor, Bureau of Labor Statistics; <http://www.bls.gov/cpi/data.htm> (accessed December 21, 2012).
- (16) Samaras, C.; Meisterling, K. Life cycle assessment of greenhouse gas emissions from plug-in hybrid vehicles: implications for policy. *Environmental science & technology*. **2008**, 42(9), 3170-6.
- (17) Notter, D. A.; Gauch, M.; Widmer, R.; Wäger, P.; Stamp, A.; Zah, R.; Althaus, H.-J. Contribution of Li-ion batteries to the environmental impact of electric vehicles. *Environmental science & technology*. **2010**, 44(17), 6550-6.
- (18) MacLean, H. L.; Lave, L. B. Life cycle assessment of automobile/fuel options. *Environmental science & technology*. **2003**, 37(23), 5445-52.
- (19) *Transportation Energy Data Book: Edition 29*; Oak Ridge National Laboratory: U.S. DOE, Oak Ridge, TN, 2010.
- (20) *Technologies and Approaches to Reducing the Fuel Consumption of Medium- and Heavy-Duty Vehicles*; The National Academies, National Research Council: Washington, D.C., 2010.
- (21) Valence. Valence Battery Modules Spreadsheet; <http://www.valence.com> (accessed February 6, 2012).

- (22) Notter, D. A.; Gauch, M.; Widmer, R.; Wäger, P.; Stamp, A.; Zah, R.; Althaus, H.-J. Contribution of Li-ion batteries to the environmental impact of electric vehicles. *Environmental science & technology*. **2010**, 44(17), 6550-6.
- (23) Majeau-Bettez, G.; Hawkins, T. R.; Stromman, A. H. Life Cycle Environmental Assessment of Lithium-Ion and Nickel Metal Hydride Batteries for Plug-In Hybrid and Battery Electric Vehicles. *Environmental science and technology*. **2011**, 4548-4554.
- (24) *2010 Municipal Solid Waste (MSW) in the United States: Facts and Figures*; U.S. EPA; <http://www.epa.gov/epawaste/nonhaz/municipal/msw99.htm> (accessed December 21, 2012).
- (25) Pomykala, J. A.; Jody, B. J.; Daniels, E. J.; Spangenberg, J. S. Automotive Recycling in the United States: Energy Conservation and Environmental Benefits. *JOM*. **2007**, 59(11):41-45.
- (26) *End-of-Life Vehicle Recycling: State of the Art of Resource Recovery from Shredder Residue*; U.S. DOE, Argonne National Laboratory: Illinois, 2011.
- (27) Smith, V. M.; Keoleian, G. A. The Value of Remanufactured Engines: Life-Cycle Environmental and Economic Perspectives. *Journal of Industrial Ecology*. **2004**, 8(1/2), 193 - 221.
- (28) *Recent Trends in Automobile Recycling: an Energy and Economic Assessment*; U.S. DOE, Oak Ridge National Laboratory: Oak Ridge, Tennessee, 1994.
- (29) Sullivan, J. L.; Gaines, L. Status of Life Cycle Inventories for Batteries. *Energy Conversion and Management*. **2012**, 58, 134-148.
- (30) Keoleian, G. A.; Sullivan, J. L. Materials Challenges and Opportunities for Enhancing the Sustainability of Automobiles. *Materials Research Society*. **2012**, 37, 365-372.
- (31) *Life-Cycle Analysis for Heavy Vehicles*; U.S. DOE, Argonne National Laboratory: Illinois, 1998.
- (32) Zamel, N.; Li, Xianguo. Life Cycle Comparison of Fuel Cell Vehicles and Internal Combustion Engine Vehicles for Canada and the United States. *Journal of Power Sources*. **2006**, 162, 1241-1253.
- (33) *Automotive Recycling Industry: Environmentally Friendly, Market Driven, and Sustainable*; Automotive Recyclers Association, Washington, D.C.; [www.autoalliance.org](http://www.autoalliance.org) (accessed December 22, 2012).

(34) Motavall, J. Smith Electric to Build Trucks in the Bronx. *The New York Times*, November 16, 2011; <http://wheels.blogs.nytimes.com/2011/11/16/smith-electric-to-build-trucks-in-the-bronx> (accessed October 7, 2012).

(35) Ramsey, M. As Electric Vehicles Arrive, Firms See Payback in Trucks. *The Wall Street Journal*, December 7, 2010;

<http://online.wsj.com/article/SB10001424052748704584804575644773552573304.html> (accessed July 24, 2012).

(36) Motavalli, J. Can We Run 18-Wheelers on Batteries? *CBS News*, August 6, 2009; [http://www.cbsnews.com/8301-505123\\_162-43140685](http://www.cbsnews.com/8301-505123_162-43140685) (accessed July 29, 2012).

(37) Valence. U-Charge® XP Specifications: <http://www.valence.com> (accessed October 10, 2012).

(38) Valence. U-Charge® U1-12RT Specifications: <http://www.valence.com> (accessed October 10, 2012).

(39) Balqon Corporation. Model Nautilus XE-20 is a Zero Emission All Electric Terminal Tractor: Specifications and Features; [http://www.balqon.com/product\\_details.php?pid=1](http://www.balqon.com/product_details.php?pid=1) (accessed October 15, 2012).

(40) *The End of the Oil Age; 2011 and beyond: A Reality Check*; Deutsche Bank Securities Inc., December 22, 2010; <http://gm.db.com> (accessed August 20, 2012).

(41) *Vehicle Electrification: More Rapid Growth; Steeper Price Declines for Batteries*; Deutsche Bank Securities Inc., March 7, 2010; <http://gm.db.com/IndependentResearch> (accessed November 21, 2011).

(42) Chevrolet. Chevrolet 2012 Specifications; [http://www.chevrolet.com/assets/pdf/en/overview/12\\_Volt\\_Spec\\_Sheet.pdf](http://www.chevrolet.com/assets/pdf/en/overview/12_Volt_Spec_Sheet.pdf) (accessed January 25, 2012).

(43) Nissan. Nissan LEAF Specifications;

<http://www.nissanusa.com/ev/media/pdf/specs/FeaturesAndSpecs.pdf> (accessed January 23, 2012).

(44) *Annual Energy Outlook 2012 - Light-Duty Vehicle Sales by Technology Type*; U.S. DOE, Energy Information Administration: Washington, D.C., 2012.



- (45) *The Recovery Act: Transforming America's Transportation Sector - Batteries and Electric Vehicles*; U.S. DOE; <http://www.whitehouse.gov/files/documents/Battery-and-Electric-Vehicle-Report-FINAL.pdf> (accessed August 20, 2011).
- (46) Fairley, P. Electric Vehicles Finally Succeed? *Technology Review*, February, 2011; <http://www.technologyreview.com/energy/26946> (accessed July 14, 2011).
- (47) *Batteries for Electric Cars: Challenges, Opportunities, and the Outlook to 2020*: The Boston Consulting Group, Boston, 2010.
- (48) *Factors Determining the Manufacturing Costs of Lithium-Ion Batteries for PHEVs*; U.S. DOE, Argonne National Laboratory: Lemont, IL, 2009; <http://www.transportation.anl.gov/pdfs/B/624.PDF> (accessed February 1, 2012).
- (49) Kromer, M. A.; Heywood, J. B. *Electric Powertrains: Opportunities and Challenges in the U. S. Light-Duty Vehicle Fleet*: MIT Sloan Automotive Laboratory: Cambridge, MA, 2007; [http://web.mit.edu/sloan-auto-lab/research/beforeh2/files/kromer\\_electric\\_powertrains.pdf](http://web.mit.edu/sloan-auto-lab/research/beforeh2/files/kromer_electric_powertrains.pdf) (accessed November 29, 2011).
- (50) *Review of the Research Program of the FreedomCAR and Fuel Partnership: Third Report*; The National Academies, National Research Council: Washington, D.C., 2010.
- (51) *Plug-In Electric Vehicle Handbook for Fleet Managers*; U.S. DOE, Office of Energy Efficiency and Renewable Energy, 2012; [www.afdc.energy.gov/pdfs/pev\\_handbook.pdf](http://www.afdc.energy.gov/pdfs/pev_handbook.pdf) (accessed July 25, 2012).
- (52) *Plugging In: A Stakeholder Investment Guide for Public Electric Vehicle Charging Infrastructure*. 2009; Rocky Mountain Institute; [http://www.rmi.org/pgr\\_resources](http://www.rmi.org/pgr_resources) (accessed December 9, 2012).
- (53) *Addressing Challenges to Electric Vehicle Charging in Multifamily Residential Buildings*, 2012; The University of California, Los Angeles; <http://luskin.ucla.edu/content/addressing-challenges-electric-vehicle-charging-multifamily-residential-buildings-0> (accessed December 2, 2012).
- (54) *Infrastructure Lessons Learned Study*, 2011; Clean Fuel Connection, Inc.; Brazell & Company; <http://www.rmi.org/Content/Files/InfrastructureLessonsLearned.pdf> (accessed November 7, 2012).

(55) *Electric Vehicle Charging Infrastructure Deployment Guidelines for the Oregon I-5 Metro Areas of Portland, Salem, Corvallis and Eugene*, 2010; Electric Transportation Engineering Corporation; <http://www.oregon.gov/ODOT/HWY/OIPP/docs/evdeployguidelines3-1.pdf> (accessed November 6, 2012).

(56) *Gasoline and Diesel Fuel Update*; U.S. DOE, Energy Information Administration: Washington, D.C., 2011; <http://www.eia.gov/petroleum/gasdiesel> (accessed August 10, 2011).

(57) *Short-Term Energy and Summer Fuels Outlook*; U.S. DOE, Energy Information Administration: Washington, D.C., 2011; <http://205.254.135.7/forecasts/steo/report/electricity.cfm> (accessed August 10, 2011).

(58) *Electric Power Monthly – April 2012*; U.S. DOE, Energy Information Administration: Washington, D.C., 2011; <http://205.254.135.24/electricity/monthly> (accessed April 8, 2012).

(59) *State Electricity Profiles 2010*; U.S. DOE, Energy Information Administration: Washington, D.C., 2012; <http://www.eia.gov/electricity/state/pdf/sep2010.pdf> (accessed April 15, 2013).
